# Supplementary material for: Tpr Misregulation in Hippocampal Neural Stem Cells in Mouse Models of Alzheimer’s Disease
Source: MDPI journal article supplement (doi:10.3390/cells12232757), 2023-12-01
Supplement: s1 [file s1]

## Article

# Tpr Misregulation in Hippocampal Neural Stem Cells in Mouse Models of Alzheimer's Disease

Subash C. Malik <sup>1,2</sup>, Jia-Di Lin <sup>1,2</sup>, Stephanie Ziegler-Waldkirch <sup>3</sup>, Stefan Tholen <sup>4</sup>, Sachin S. Deshpande <sup>1,2</sup>, Marius Schwabenland <sup>5</sup>, Oliver Schilling <sup>4</sup>, Andreas Vlachos <sup>6,7,8</sup>, Melanie Meyer-Luehmann <sup>3,8</sup> and Christian Schachtrup <sup>1,8,\*</sup>

<sup>1</sup> Institute of Anatomy and Cell Biology, University of Freiburg, 79104 Freiburg, Germany; subash.chandra.malik@ki.se (S.C.M.); jia-di.lin@anat.uni-freiburg.de (J.-D.L.); deshpande03@gmail.com (S.S.D.)

<sup>2</sup> Faculty of Biology, University of Freiburg, 79104 Freiburg, Germany

<sup>3</sup> Department of Neurology, Medical Center, Faculty of Medicine, University of Freiburg, 79106 Freiburg, Germany; stephanie.waldkirch@uniklinik-freiburg.de (S.Z.-W.); melanie.meyer-luehmann@uniklinik-freiburg.de (M.M.-L.)

<sup>4</sup> Institute of Surgical Pathology, Medical Center, University of Freiburg, 79106 Freiburg, Germany; stefan.tholen@uniklinik-freiburg.de (S.T.); oliver.schilling@uniklinik-freiburg.de (O.S.)

<sup>5</sup> Institute of Neuropathology, University of Freiburg, 79106 Freiburg, Germany

<sup>6</sup> Department of Neuroanatomy, Institute of Anatomy and Cell Biology, Faculty of Medicine, University of Freiburg, 79104 Freiburg, Germany; andreas.vlachos@anat.uni-freiburg.de

<sup>7</sup> Center BrainLinks-BrainTools, University of Freiburg, 79110 Freiburg, Germany

<sup>8</sup> Center for Basics in Neuromodulation (NeuroModul Basics), Faculty of Medicine, University of Freiburg, 79106 Freiburg, Germany

\* Correspondence: christian.schachtrup@anat.uni-freiburg.de

## Supplemental Figures and Tables

## **Table of Contents**

### **S1. Supplemental Figures**

S1.1 Tpr phosphorylation determines the subcellular localization in NSPCs of the hippocampus

S1.2 Increased Tpr expression precedes hippocampal neurogenesis in 5xFAD mice

S1.3 Tpr and P-Tpr interactome in NSPCs

S1.4 Tpr siRNA knockdown in primary NSPCs

### **S2. Supplemental Tables**

S2.1 Supplemental Table S1: Tpr interacting proteins of WT adult NSPCs.

S2.2 Supplemental Table S2: P-Tpr interacting proteins of WT adult NSPCs.

## S1. Supplemental Figures

### S1.1 *Tpr* phosphorylation determines the subcellular localization in NSPCs of the hippocampus

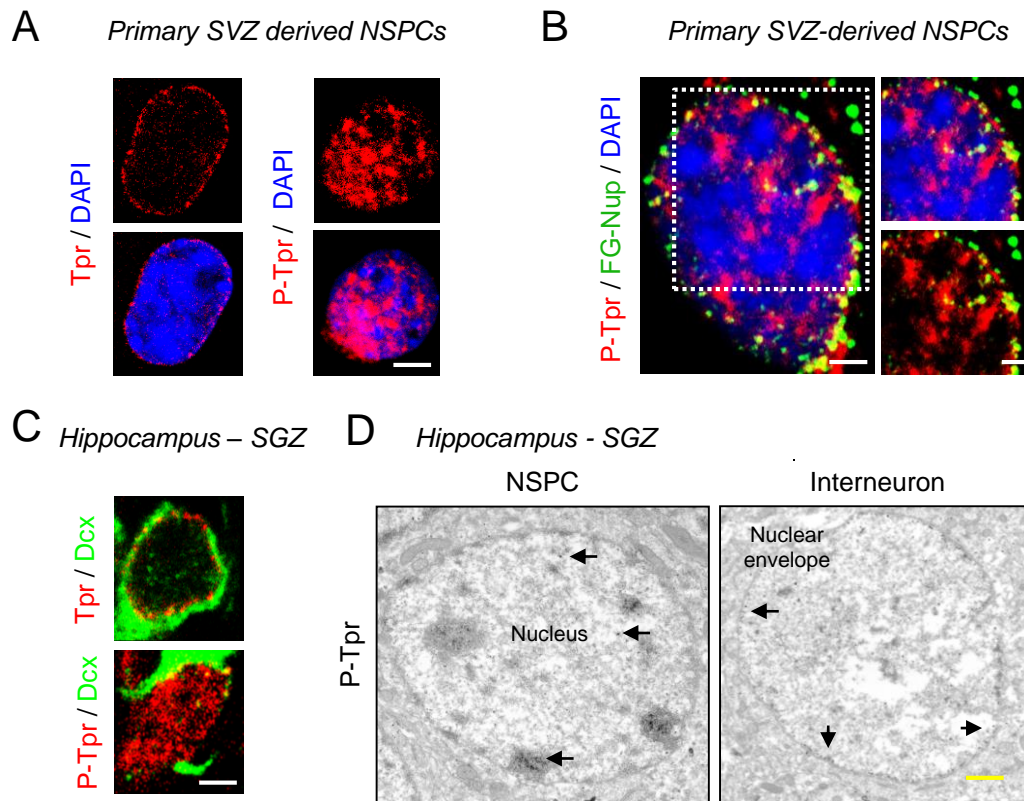

### Supplemental Figure S1. *Tpr* phosphorylation determines the subcellular localization in NSPCs of the hippocampus.

(A) Immunolabeling for P-Tpr (red, right) and Tpr (red, left) in NSPCs *in vitro*. Nuclei are stained with DAPI (blue). Representative image from three independent experiments (A total number of 20 cells per Tpr or P-Tpr was analyzed). Scale bar: 3.3  $\mu\text{m}$ . (B) Immunolabeling for P-Tpr (red) and FG-Nup (green) in NSPCs *in vitro*. Enlargements at the right indicate nuclear P-Tpr (red) localization in NSPCs. Nuclei are stained with DAPI (blue). Scale bars: 2  $\mu\text{m}$ . (C) Immunolabeling for P-Tpr (red, right) or Tpr (red, left) in combination with DCX (green, marker for neuroblasts) in hippocampal SGZ NSPCs in adult WT mice. Representative image from three independent experiments (A total number of 20 cells per Tpr+DCX+ or P-Tpr+DCX+ cells was analyzed). Scale bar: 3.3  $\mu\text{m}$ . (D) Electron microscopy determining the P-Tpr localization in NSPCs of the hippocampal SGZ in comparison to hippocampal interneurons in adult WT mice. Black arrows indicating nuclear P-Tpr (left) and nuclear envelope P-Tpr (right). Representative image from three independent experiments (A total number of 10 cells per NSPCs or interneurons for P-Tpr localization was analyzed). Scale bar: 1  $\mu\text{m}$ .

### S1.2 Increased *Tpr* expression precedes hippocampal neurogenesis in 5xFAD mice

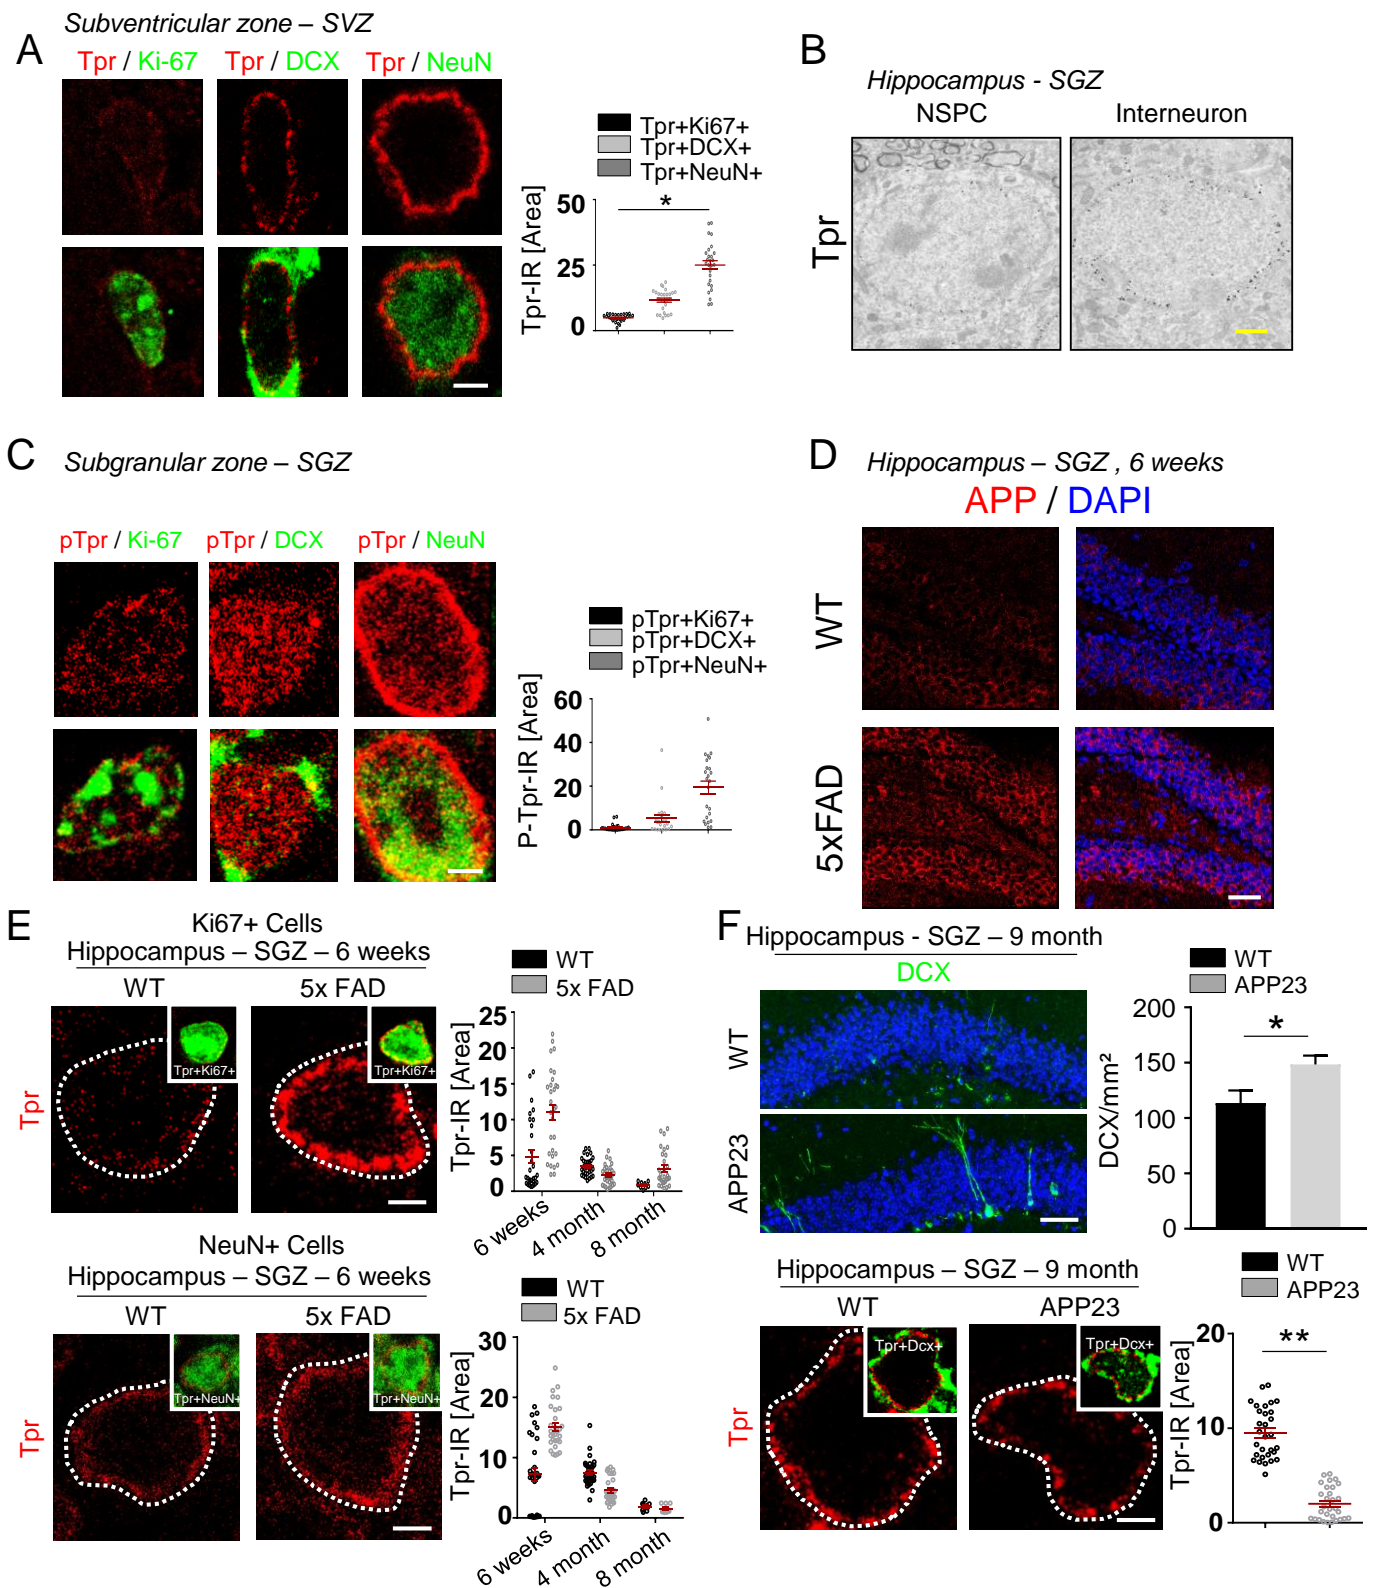

Supplemental Figure S2. Increased *Tpr* expression precedes hippocampal neurogenesis in 5xFAD mice.

**(A)** Immunolabeling for Tpr (red) and Ki-67, DCX, and NeuN (all red) in individual cells in the SVZ of adult WT mice. Quantification of Tpr immunoreactivity in Ki-67+, DCX+ and NeuN+ cells in the SVZ of adult WT mice ( $n = 3$  mice, a total number of 27 single cells per Tpr+Ki-67+, Tpr+DCX+ or Tpr+NeuN+ condition were analyzed). Scale bar: 2  $\mu\text{m}$ . Values are mean  $\pm$  SEM (P-values calculated by one-way ANOVA and Bonferroni's multiple comparisons test,  $*P < 0.05$ ). **(B)** Electron microscopy determining the Tpr expression in NSPCs of the hippocampal SGZ in comparison to hippocampal interneurons in adult WT mice ( $n = 2$  mice, a total number of 10 single cells per NSPCs or interneurons for Tpr localization were analyzed). Scale bar: 1  $\mu\text{m}$ . **(C)** Immunolabeling for P-Tpr (red) and Ki-67, DCX, and NeuN (all green) in individual cells in the SGZ of adult WT mice. Quantification of P-Tpr immunoreactivity in Ki-67+, DCX+ and NeuN+ cells in the SGZ of adult WT mice ( $n = 4$  mice, a total number of 22-24 single cells per P-Tpr+Ki-67+, P-Tpr+DCX+ or P-Tpr+NeuN+ condition were analyzed). Scale bar: 2  $\mu\text{m}$ . Values are mean  $\pm$  SEM. **(D)** Immunolabeling for APP (red) in the hippocampus of 5xFAD mice in comparison to WT mice at 6 weeks of age. Representative images from  $n=3$  mice. Scale bar: 50  $\mu\text{m}$ . **(E)** Immunolabeling for Tpr (red) in individual cells in the SGZ of the hippocampus of 5xFAD mice compared to control mice sacrificed at 6 weeks of age (Inlets: Tpr+Ki67+ cells (top) and Tpr+NeuN+ cells (bottom) in the SGZ of the hippocampus). Scale bars: 2  $\mu\text{m}$ . Quantification of Tpr immunoreactivity in Ki67+ cells and NeuN+ cells, respectively, in the hippocampal SGZ of 5xFAD mice compared to control mice at 6 weeks and 4 and 8 months of age ( $n = 3$  mice, a total number of 30-32 single cells of Ki67+ or NeuN+ cells at 6 weeks and 4 month in WT and 5X FAD mice were analyzed and a total number of 9 (WT mice) and 29 (5X FAD mice) single cells of Ki67+ or NeuN+ cells were analyzed at 8 month of age. **(F)** Immunolabeling for DCX (green) in the hippocampus of APP23 mice compared to control mice sacrificed at 9 months of age (top). Scale bar: 50  $\mu\text{m}$ . Quantification of DCX+ cells in the hippocampal SGZ of APP23 mice compared to control mice at 9 months of age ( $n = 3$  mice). Values are mean  $\pm$  SEM (P-values calculated by unpaired Student's  $t$  test,  $*P < 0.05$ ). Immunolabeling for Tpr (red) in the SGZ of the hippocampus of APP23 mice compared to control mice sacrificed at 9 months of age (Inlets: only Tpr+DCX+ cells in the SGZ of the hippocampus were analyzed) ( $n = 3$  mice, a total number of 30 single cells for Tpr immunoreactivity in the hippocampal SGZ in WT and APP23 mice were analyzed). Scale bar: 2  $\mu\text{m}$ . Quantification of Tpr immunoreactivity in DCX+ cells in the hippocampal SGZ of APP23 mice compared to control mice at 9 months of age. Values are mean  $\pm$  SEM (P-values calculated by unpaired Student's  $t$  test,  $**P < 0.01$ ).

### S1.3 Tpr and P-Tpr interactome in NSPCs

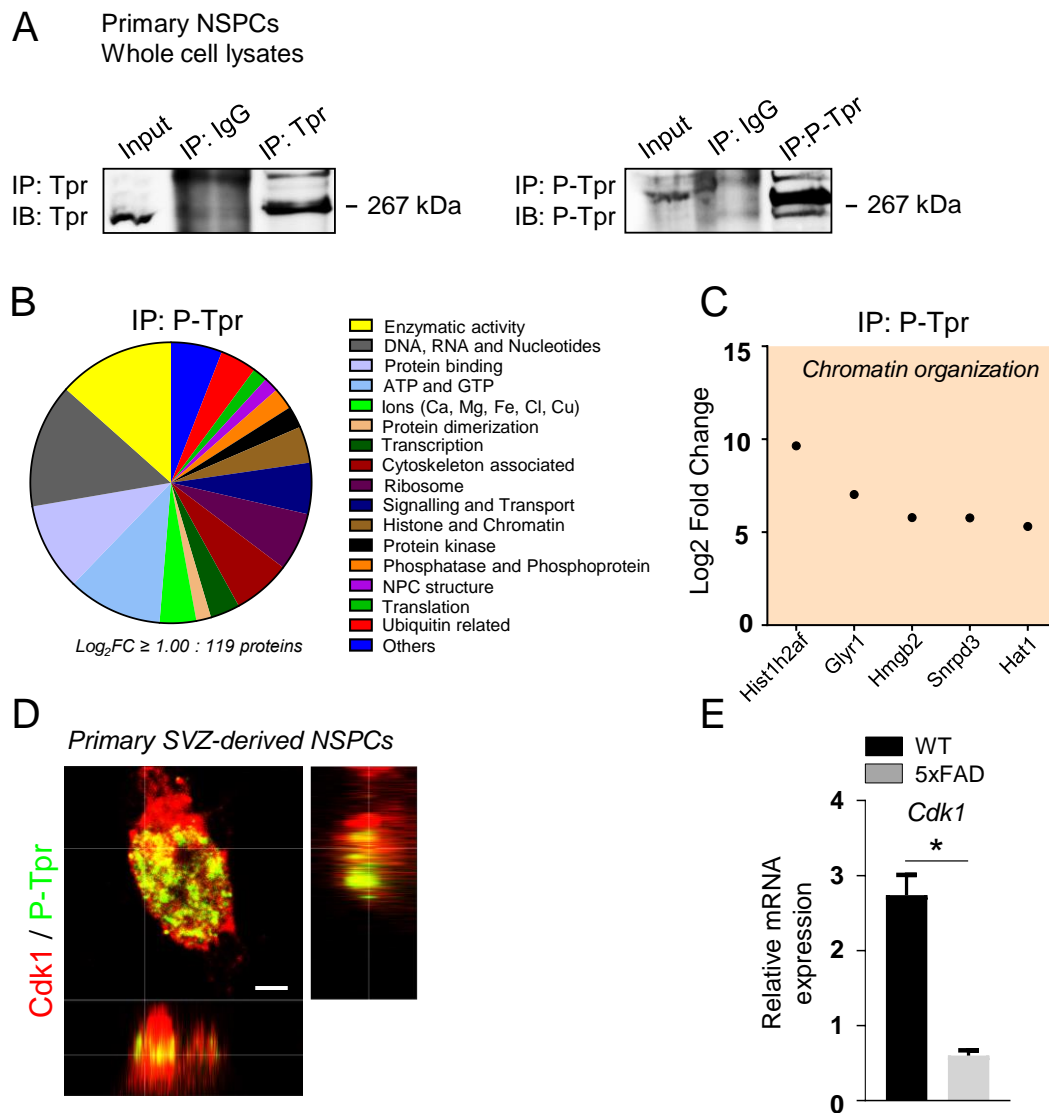

**Supplemental Figure S3. Tpr and P-Tpr interactome in NSPCs.**

**(A)** Co-immunoprecipitation (Co-IP) with Tpr and P-Tpr in whole-cell lysates of SVZ-derived NSPCs. Representative immunoblots from three independent experiments. **(B)** Pie chart of identified P-Tpr interaction partner in NSPCs classified via the Gene Ontology (GO) nomenclature. **(C)** Plot showing top five interaction partners with a log<sub>2</sub> fold value ≥ 5.0 for P-Tpr involved in chromatin organization and control of stem cell fate. **(D)** Immunolabeling for Cdk1 (red) in combination with P-Tpr (red) revealing colocalization of P-Tpr with Cdk1 in the nucleus (yellow). Representative image from two independent experiments (a total number of 10 cells was analyzed). Scale bar: 3 μm. **(E)** Decreased Cdk1 gene expression in hippocampal SGZ tissue of 8-month-old 5xFAD mice compared to control mice ( $n = 2$  mice per genotype) performed by RT-PCR analysis performed in duplicate (P-values calculated by student's  $t$  test, \* $P < 0.05$ ).

### S1.4 Tpr siRNA knockdown in primary NSPCs

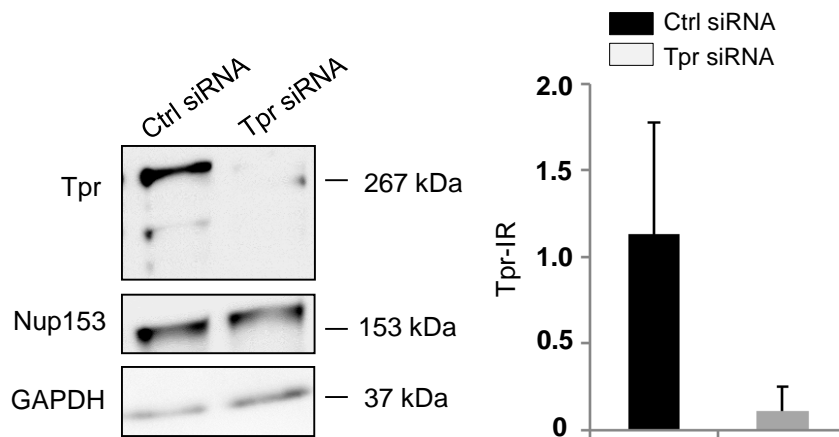

**Supplemental Figure S4. Tpr siRNA knockdown in primary NSPCs.**

Protein expression of Tpr using lysate of NSPCs 1 day after electroporation with Tpr siRNA and scramble siRNA (control) determined by western blotting. Quantification of Tpr immunoreactivity in Tpr-depleted NSPCs compared to control cells. Ctrl, control; siRNA, small interfering RNA. Representative immunoblots are shown from two independent experiments.

## S2. Supplemental Tables

### S2.1 Supplemental Table S1: Tpr-interacting proteins of WT adult NSPCs.

Supplemental Table S1: Table showing 759 Tpr interacting proteins of WT adult NSPCs with a Log2 FC > 1.0.

| Protein IDs | Protein names                                           | Gene names | Unique peptides | Sequence coverage [%] | Log2 fold-change (FC) of LFQ intensity (a-TPR/IgG) |
|-------------|---------------------------------------------------------|------------|-----------------|-----------------------|----------------------------------------------------|
| P25976      | Nucleolar transcription factor 1                        | Ubt1       | 53              | 48,8                  | 1,569809859                                        |
| Q7JJ13      | Bromodomain-containing protein 2                        | Brd2       | 44              | 54,6                  | 1,830780269                                        |
| Q3U0V1      | Far upstream element-binding protein 2                  | Khsrp      | 40              | 57                    | 1,197171454                                        |
| E9Q5C9      |                                                         | Nolc1      | 44              | 43,7                  | 1,329159023                                        |
| Q8BTI8      | Serine/arginine repetitive matrix protein 2             | Srrm2      | 41              | 21,3                  | 1,634042181                                        |
| Q9JIX8      | Apoptotic chromatin condensation inducer in the nucleus | Acin1      | 39              | 33,5                  | 1,229755172                                        |
| Q91VN6      | Probable ATP-dependent RNA helicase DDX41               | Ddx41      | 38              | 62,9                  | 1,441561598                                        |
| Q8BHL3      | TBC1 domain family member 10B                           | Tbc1d10b   | 37              | 47                    | 1,665057358                                        |
| O54774      | AP-3 complex subunit delta-1                            | Ap3d1      | 33              | 34,7                  | 1,577511208                                        |
| Q8K2F0;     | Bromodomain-containing protein 3                        | Brd3       | 27              | 40,8                  | 1,996823053                                        |

|                                           |                                                                                  |                               |    |      |             |
|-------------------------------------------|----------------------------------------------------------------------------------|-------------------------------|----|------|-------------|
| <b>Q91Y44</b>                             |                                                                                  |                               |    |      |             |
| <b>A2AQ19</b>                             | RNA polymerase-associated protein<br>RTF1 homolog                                | Rtf1                          | 28 | 38   | 2,320407779 |
| <b>P62908</b>                             | 40S Ribosomal protein S3                                                         | Rps3                          | 26 | 83,5 | 1,122783141 |
| <b>Q5F2E8</b>                             | Serine/threonine-protein kinase<br>TAO1                                          | Taok1                         | 22 | 25   | 2,043417601 |
| <b>A0A1Y7VKY1;<br/>F6YVP7;<br/>P62270</b> | 40S Ribosomal protein S18                                                        | Gm10260;<br>Rps18             | 23 | 62,5 | 1,230576431 |
| <b>Q6NSQ7</b>                             | Protein LTV1 homolog                                                             | Ltv1                          | 22 | 54   | 2,934466665 |
| <b>P97868</b>                             | E3 ubiquitin-protein ligase RBBP6                                                | Rbbp6                         | 22 | 19,4 | 2,121588475 |
| <b>O08784</b>                             | Treacle protein                                                                  | Tcof1                         | 22 | 19,1 | 1,714693876 |
| <b>Q3UMU9</b>                             | Hepatoma-derived growth factor-<br>related protein 2                             | Hdgfrp2                       | 22 | 37,1 | 1,355634343 |
| <b>Q3V1V3</b>                             | ESF1 homolog                                                                     | Esf1                          | 21 | 25,7 | 2,582366338 |
| <b>Q8VDM6</b>                             | Heterogeneous nuclear<br>ribonucleoprotein U-like protein 1                      | Hnrnpul1                      | 20 | 33,8 | 1,330628683 |
| <b>P23116</b>                             | Eukaryotic translation initiation<br>factor 3 subunit A                          | Eif3a                         | 19 | 17,6 | 1,67169448  |
| <b>Q8R1B4</b>                             | Eukaryotic translation initiation<br>factor 3 subunit C                          | Eif3c                         | 19 | 22,1 | 1,156168458 |
| <b>P55096</b>                             | ATP-binding cassette sub-family D<br>member 3                                    | Abcd3                         | 19 | 32,5 | 1,143131998 |
| <b>Q8BGS1</b>                             | Band 4.1-like protein 5                                                          | Epb41l5                       | 18 | 36,1 | 1,683164414 |
| <b>Q9QZF2</b>                             | Glypican-1; Secreted glypican-1                                                  | Gpc1                          | 17 | 39,3 | 1,109327499 |
| <b>Q9D6Z1</b>                             | Nucleolar protein 56                                                             | Nop56                         | 17 | 32,2 | 1,075016063 |
| <b>P30415</b>                             | NK-tumor recognition protein;<br>Putative peptidyl-prolyl cis-trans<br>isomerase | Nktr                          | 16 | 16,4 | 1,904342155 |
| <b>P63089</b>                             | Pleiotrophin                                                                     | Ptn                           | 16 | 61,9 | 1,6521214   |
| <b>P62852</b>                             | 40S Ribosomal protein S25                                                        | Rps25                         | 16 | 55,2 | 1,211770512 |
| <b>Q8C5N3;<br/>A2AK44;<br/>A2AK42</b>     | Pre-mRNA-splicing factor CWC22<br>homolog                                        | Cwc22;<br>Gm13695;<br>Gm13697 | 15 | 18,1 | 2,557003563 |
| <b>Q52KI8</b>                             | Serine/arginine repetitive matrix<br>protein 1                                   | Srrm1                         | 15 | 17,1 | 2,300792903 |
| <b>P70318</b>                             | Nucleolysin TIAR                                                                 | Tial1                         | 10 | 46,9 | 1,764555209 |
| <b>Q9DC71</b>                             | 28S Ribosomal protein S15,<br>mitochondrial                                      | Mrps15                        | 15 | 45,7 | 1,48289261  |
| <b>Q91WJ8</b>                             | Far-upstream element-binding<br>protein 1                                        | Fubp1                         | 15 | 32,4 | 1,426133106 |



|                                       |                                                                         |          |    |      |             |
|---------------------------------------|-------------------------------------------------------------------------|----------|----|------|-------------|
| <b>O70503</b>                         | Very-long-chain 3-oxoacyl-CoA reductase                                 | Hsd17b12 | 15 | 49   | 1,245107691 |
| <b>Q64512</b>                         | Tyrosine-protein phosphatase non-receptor type 13                       | Ptpn13   | 14 | 7,7  | 4,684448381 |
| <b>P40201;<br/>E9PZM4</b>             | Chromodomain-helicase-DNA-binding protein 1                             | Chd1     | 14 | 11,7 | 2,623603558 |
| <b>P97376</b>                         | Protein FRG1                                                            | Frg1     | 14 | 41,1 | 2,109152979 |
| <b>Q60932</b>                         | Voltage-dependent anion-selective channel protein 1                     | Vdac1    | 14 | 63,5 | 1,85475873  |
| <b>Q7TNV0</b>                         | Protein DEK                                                             | Dek      | 14 | 28,7 | 1,749429026 |
| <b>P11031</b>                         | Activated RNA polymerase II transcriptional coactivator p15             | Sub1     | 14 | 63   | 1,487430892 |
| <b>Q6ZQ38</b>                         | Cullin-associated NEDD8-dissociated protein 1                           | Cand1    | 13 | 13,4 | 1,451981026 |
| <b>Q9WVA3</b>                         | Mitotic checkpoint protein BUB3                                         | Bub3     | 14 | 51,2 | 1,271692235 |
| <b>Q6P542</b>                         | ATP-binding cassette sub-family F member 1                              | Abcf1    | 13 | 22,6 | 3,805878161 |
| <b>D3Z0M9</b>                         |                                                                         | Ddx23    | 13 | 20   | 1,667425576 |
| <b>A2AR02</b>                         | Peptidyl-prolyl cis-trans isomerase G                                   | Ppig     | 13 | 15,2 | 1,40428315  |
| <b>Q8BKC5</b>                         | Importin-5                                                              | Ipo5     | 13 | 16,3 | 1,394805135 |
| <b>Q9ERI5</b>                         | Bifunctional arginine demethylase and lysyl-hydroxylase JMJD6           | Jmjd6    | 13 | 42,2 | 1,23916841  |
| <b>Q80WJ7</b>                         | Protein LYRIC                                                           | Mtdh     | 13 | 35,2 | 1,020763496 |
| <b>Q3UFY8</b>                         | Mitochondrial ribonuclease P protein 1                                  | Trmt10c  | 12 | 36   | 4,055607206 |
| <b>Q8K0C4</b>                         | Lanosterol 14-alpha demethylase                                         | Cyp51a1  | 12 | 26,6 | 3,187238185 |
| <b>Q8BMC4</b>                         | Nucleolar protein 9                                                     | Nop9     | 12 | 28,1 | 1,953765849 |
| <b>O55143;<br/>Q8R429;<br/>Q64518</b> | Sarcoplasmic/endoplasmic reticulum calcium ATPase 2                     | Atp2a2   | 12 | 17,4 | 1,93219986  |
| <b>Q9ESX5</b>                         | H/ACA ribonucleoprotein complex subunit 4                               | Dkc1     | 12 | 33,8 | 1,570576343 |
| <b>Q9CR62</b>                         | Mitochondrial 2-oxoglutarate/malate carrier protein                     | Slc25a11 | 12 | 40,1 | 1,544761529 |
| <b>Q9R0N3</b>                         | Synaptotagmin-11                                                        | Syt11    | 12 | 36,7 | 1,106520452 |
| <b>Q9DBG6</b>                         | Dolichyl-diphosphooligosaccharide-protein glycosyltransferase subunit 2 | Rpn2     | 12 | 31,1 | 1,075666201 |
| <b>A2A6A1</b>                         | G patch domain-containing protein 8                                     | Gpatch8  | 11 | 8,8  | 5,127961262 |
| <b>Q9JKF1</b>                         | Ras GTPase-activating-like protein IQGAP1                               | Iqgap1   | 11 | 10,3 | 4,714841555 |

|                |                                                                              |          |    |      |             |
|----------------|------------------------------------------------------------------------------|----------|----|------|-------------|
| <b>Q99LX5</b>  | Multiple myeloma tumor-associated protein 2 homolog                          | Mmtag2   | 11 | 47,7 | 3,623905227 |
| <b>Q9Z1G4</b>  | V-type proton ATPase 116 kDa subunit a isoform 1                             | Atp6v0a1 | 11 | 16,6 | 2,616872227 |
| <b>Q9R020</b>  | Zinc-finger Ran-binding domain-containing protein 2                          | Zranb2   | 11 | 31,5 | 2,378296745 |
| <b>P67984</b>  | 60S Ribosomal protein L22                                                    | Rpl22    | 10 | 70,3 | 1,606827152 |
| <b>Q07646</b>  | Mesoderm-specific transcript protein                                         | Mest     | 11 | 36,7 | 1,565936918 |
| <b>Q8VD75</b>  | Huntingtin-interacting protein 1                                             | Hip1     | 11 | 14,2 | 1,520339636 |
| <b>Q9D4J7</b>  | PHD finger protein 6                                                         | Phf6     | 11 | 39,3 | 1,304397979 |
| <b>P51655</b>  | Glypican-4; Secreted glypican-4                                              | Gpc4     | 10 | 26   | 1,208546295 |
| <b>P52019</b>  | Squalene monooxygenase                                                       | Sqle     | 11 | 28,7 | 1,050630992 |
| <b>Q9WVK4</b>  | EH domain-containing protein 1                                               | Ehd1     | 9  | 29,2 | 12,68575623 |
| <b>Q64133</b>  | Amine oxidase [flavin-containing] A                                          | Maoa     | 10 | 25,7 | 2,520346966 |
| <b>Q9CY27</b>  | Very-long-chain enoyl-CoA reductase                                          | Tecr     | 10 | 26,3 | 1,814151222 |
| <b>Q08288</b>  | Cell growth-regulating nucleolar protein                                     | Lyar     | 10 | 24,2 | 1,78693155  |
| <b>E9Q557</b>  | Desmoplakin                                                                  | Dsp      | 10 | 4,2  | 1,514336417 |
| <b>Q60930</b>  | Voltage-dependent anion-selective channel protein 2                          | Vdac2    | 10 | 43,7 | 1,283168863 |
| <b>Q99LC3</b>  | NADH dehydrogenase [ubiquinone] 1 alpha subcomplex subunit 10, mitochondrial | Ndufa10  | 9  | 31   | 13,34789814 |
| <b>Q91UZ1</b>  | Phosphoinositide phospholipase C                                             | Plcb4    | 9  | 8,5  | 11,39156582 |
| <b>P62141</b>  | Serine/threonine-protein phosphatase PP1-beta catalytic subunit              | Ppp1cb   | 2  | 38,5 | 10,60917874 |
| <b>Q99P88</b>  | Nuclear pore complex protein Nup155                                          | Nup155   | 9  | 9,3  | 4,256093489 |
| <b>Q8K224</b>  | N-acetyltransferase 10                                                       | Nat10    | 9  | 10,1 | 3,653141754 |
| <b>Q6NV83</b>  | U2 snRNP-associated SURP motif-containing protein                            | U2surp   | 9  | 10,3 | 3,405930634 |
| <b>Q8QZY1</b>  | Eukaryotic translation initiation factor 3 subunit L                         | Eif3l    | 9  | 20,4 | 2,826637372 |
| <b>Q3UQU0</b>  | Bromodomain-containing protein 9                                             | Brd9     | 9  | 21,5 | 2,730081234 |
| <b>Q9DBR0</b>  | A-Kinase anchor protein 8                                                    | Akap8    | 9  | 23,3 | 2,695930757 |
| <b>Q5F2E7</b>  | Nuclear fragile X mental retardation-interacting protein 2                   | Nufip2   | 9  | 21,4 | 2,665465576 |
| <b>Q9CS00</b>  | Cactin                                                                       | Cactin   | 9  | 15,2 | 2,494941284 |
| <b>P06151;</b> | L-Lactate dehydrogenase A chain                                              | Ldha     | 9  | 29,5 | 2,221730093 |

|                                                                   |                                                                                                            |              |   |      |             |
|-------------------------------------------------------------------|------------------------------------------------------------------------------------------------------------|--------------|---|------|-------------|
| <b>P00342</b>                                                     |                                                                                                            |              |   |      |             |
| <b>Q3TVI8</b>                                                     | Pre-B-cell leukemia transcription factor-interacting protein 1                                             | Pbxip1       | 9 | 16   | 2,097903481 |
| <b>Q05D44</b>                                                     | Eukaryotic translation initiation factor 5B                                                                | Eif5b        | 9 | 11,3 | 1,749933916 |
| <b>Q9Z1T1</b>                                                     | AP-3 complex subunit beta-1                                                                                | Ap3b1        | 7 | 11   | 1,681449316 |
| <b>Q9D0M3</b>                                                     | Cytochrome c1, heme protein, mitochondrial                                                                 | Cyc1         | 9 | 38,2 | 1,236597124 |
| <b>O08547</b>                                                     | Vesicle-trafficking protein SEC22b                                                                         | Sec22b       | 9 | 34   | 1,163500498 |
| <b>P97762</b>                                                     | Retinitis pigmentosa 9 protein homolog                                                                     | rp9          | 9 | 33,8 | 1,048972924 |
| <b>A2AJT4</b>                                                     | Arginine/serine-rich protein PNISR                                                                         | Pnistr       | 8 | 9,6  | 13,34151882 |
| <b>Q99ME9</b>                                                     | Nucleolar GTP-binding protein 1                                                                            | Gtpbp4       | 8 | 16,1 | 12,49832567 |
| <b>Q6P9S0</b>                                                     | MTSS1-like protein                                                                                         | Mtss1l       | 8 | 21   | 12,2625647  |
| <b>Q9CSP9</b>                                                     | Tetratricopeptide repeat protein 14                                                                        | Ttc14        | 8 | 12,7 | 4,261251796 |
| <b>Q9ESU6</b>                                                     | Bromodomain-containing protein 4                                                                           | Brd4         | 8 | 11,5 | 2,78047406  |
| <b>Q6PDM2;<br/>Q9D0B0</b>                                         | Serine/arginine-rich splicing factor 1                                                                     | Srsf1        | 8 | 37,1 | 2,589945724 |
| <b>Q61543</b>                                                     | Golgi apparatus protein 1                                                                                  | Glg1         | 8 | 11,4 | 2,578721452 |
| <b>Q3UMQ8</b>                                                     | H/ACA ribonucleoprotein complex non-core subunit NAF1                                                      | Naf1         | 8 | 31,1 | 2,376996492 |
| <b>Q9CR80</b>                                                     | Protein FAM32A                                                                                             | Fam32a       | 8 | 48,2 | 2,302596004 |
| <b>Q921I2</b>                                                     | Kelch domain-containing protein 4                                                                          | Klhdc4       | 8 | 18,5 | 2,099199111 |
| <b>Q8BMA6</b>                                                     | Signal recognition particle subunit SRP68                                                                  | Srp68        | 8 | 19,7 | 1,820212035 |
| <b>O55128</b>                                                     | Histone deacetylase complex subunit SAP18                                                                  | Sap18        | 8 | 45,1 | 1,807422151 |
| <b>Q9ESW4</b>                                                     | Acylglycerol kinase, mitochondrial                                                                         | Agk          | 8 | 26,8 | 1,664031769 |
| <b>P47856</b>                                                     | Glutamine-fructose-6-phosphate aminotransferase [isomerizing] 1                                            | Gfpt1        | 7 | 17,8 | 1,516397856 |
| <b>Q9D8X2</b>                                                     | Coiled-coil domain-containing protein 124                                                                  | Ccdc124      | 8 | 35,5 | 1,458399982 |
| <b>Q8VEM8</b>                                                     | Phosphate carrier protein, mitochondrial                                                                   | Slc25a3      | 8 | 26,6 | 1,310700537 |
| <b>Q99N93</b>                                                     | 39S ribosomal protein L16, mitochondrial                                                                   | Mrpl16       | 8 | 31,9 | 1,189945134 |
| <b>Q8BMJ3;Q60872;J3QNT6;Q3UTA4;Q3TQZ4;J3QQ02;J3QPI8;J3QP87;A0</b> | Eukaryotic translation initiation factor 1A, X-chromosomal;<br>Eukaryotic translation initiation factor 1A | Eif1ax;Eif1a | 8 | 69,4 | 1,156827885 |

|                                                                                    |                                                                  |                 |   |      |             |
|------------------------------------------------------------------------------------|------------------------------------------------------------------|-----------------|---|------|-------------|
| A1Y7VNG9;A<br>0A1Y7VLT7;A<br>0A1Y7VK80;A<br>0A1Y7VJE9;Q<br>8BX20;Q3UT5<br>3;J3QMW5 |                                                                  |                 |   |      |             |
| P24369                                                                             | Peptidyl-prolyl cis-trans isomerase B                            | Ppib            | 8 | 41,2 | 1,096503284 |
| Q91VA7                                                                             | Isocitrate dehydrogenase [NAD] subunit, mitochondrial            | Idh3b           | 8 | 27,6 | 1,083705815 |
| Q3UY34                                                                             | Uncharacterized protein C12orf43 homolog                         |                 | 7 | 49,6 | 12,4655409  |
| Q91X97;<br>P84075                                                                  | Neurocalcin-delta                                                | Ncald           | 5 | 34,2 | 12,3343571  |
| Q8BG79                                                                             | CWF19-like protein 2                                             | Cwf19l2         | 7 | 9,5  | 12,14602764 |
| P62874;<br>P29387;<br>Q61011                                                       | Guanine nucleotide-binding protein G(I)/G(S)/G(T) subunit beta-1 | Gnb1            | 2 | 26,5 | 10,23876298 |
| Q6GQS1                                                                             | Calcium-binding mitochondrial carrier protein SCaMC-3            | Slc25a23        | 7 | 21,2 | 4,438015112 |
| Q9DBF7                                                                             | Pre-mRNA-splicing factor CWC25 homolog                           | Cwc25           | 7 | 16,1 | 2,926923208 |
| Q9D710                                                                             | Thioredoxin-related transmembrane protein 2                      | Tmx2            | 7 | 30,5 | 2,414742526 |
| Q80X85                                                                             | 28S Ribosomal protein S7, mitochondrial                          | Mrps7           | 7 | 42,1 | 2,180286639 |
| Q9CVI2                                                                             | Protein FAM133B                                                  | Fam133b         | 7 | 27,8 | 2,060257099 |
| P83887;<br>Q8VCK3                                                                  | Tubulin gamma-1 chain;<br>Tubulin gamma-2 chain                  | Tubg1;<br>Tubg2 | 7 | 26,8 | 2,059437414 |
| Q9D328                                                                             | Transmembrane protein 35                                         | Tmem35          | 7 | 23,4 | 1,643186899 |
| P97807                                                                             | Fumarate hydratase, mitochondrial                                | Fh              | 7 | 22,9 | 1,520132022 |
| Q8VHE0                                                                             | Translocation protein SEC63 homolog                              | Sec63           | 7 | 12,6 | 1,281150847 |
| P06745;<br>CON_Q3ZB<br>D7                                                          | Glucose-6-phosphate isomerase                                    | Gpi             | 7 | 23,1 | 1,217423794 |
| Q9EPL8                                                                             | Importin-7                                                       | Ipo7            | 7 | 7,5  | 1,085930743 |
| Q9R087                                                                             | Glypican-6; Secreted glypican-6                                  | Gpc6            | 7 | 20,9 | 1,073599996 |
| P61222                                                                             | ATP-binding cassette sub-family E member 1                       | Abce1           | 7 | 15,4 | 1,070229698 |
| Q8R323                                                                             | Replication factor C subunit 3                                   | Rfc3            | 7 | 21,9 | 1,025277644 |

|                                                                                                   |                                                                                                                     |                 |   |      |             |
|---------------------------------------------------------------------------------------------------|---------------------------------------------------------------------------------------------------------------------|-----------------|---|------|-------------|
| <b>P08752;<br/>B2RSH2;<br/>Q9DC51;<br/>P20612;<br/>Q3V3I2;<br/>P50149;<br/>P18872;<br/>Q8CGK7</b> | Guanine nucleotide-binding protein G(i) subunit alpha-2;<br>Guanine nucleotide-binding protein G(i) subunit alpha-1 | Gnai2;<br>Gnai1 | 6 | 23,9 | 1,019123775 |
| <b>Q9CWX9</b>                                                                                     | Probable ATP-dependent RNA helicase DDX47                                                                           | Ddx47           | 6 | 20,2 | 12,48728736 |
| <b>Q8BGH4</b>                                                                                     | Receptor expression-enhancing protein 1                                                                             | Reep1           | 6 | 29,9 | 12,1365426  |
| <b>Q8BU14</b>                                                                                     | Translocation protein SEC62                                                                                         | Sec62           | 6 | 12,1 | 11,92224989 |
| <b>Q8BYC6</b>                                                                                     | Serine/threonine-protein kinase TAO3                                                                                | Taok3           | 6 | 10,1 | 11,49255424 |
| <b>Q9CS84</b>                                                                                     | Neurexin-1                                                                                                          | Nrxn1           | 4 | 5    | 10,84180019 |
| <b>O88665</b>                                                                                     | Bromodomain-containing protein 7                                                                                    | Brd7            | 6 | 15,5 | 4,686056343 |
| <b>Q8C4U3</b>                                                                                     | Secreted frizzled-related protein 1                                                                                 | Sfrp1           | 6 | 27,1 | 4,181750437 |
| <b>O88844</b>                                                                                     | Isocitrate dehydrogenase [NADP] cytoplasmic                                                                         | Idh1            | 6 | 21,3 | 3,675409449 |
| <b>Q9D0K1</b>                                                                                     | Peroxisomal membrane protein PEX13                                                                                  | Pex13           | 6 | 21,5 | 3,315077529 |
| <b>Q8BHF7</b>                                                                                     | CDP-diacylglycerol-glycerol-3-phosphate 3-phosphatidyltransferase, mitochondrial                                    | Pgs1            | 6 | 14,8 | 2,865103453 |
| <b>Q922B2</b>                                                                                     | Aspartate-tRNA ligase, cytoplasmic                                                                                  | Dars            | 6 | 16,2 | 2,829998016 |
| <b>Q8BVY0</b>                                                                                     | Ribosomal L1 domain-containing protein 1                                                                            | Rsl1d1          | 6 | 13,1 | 2,635821123 |
| <b>P58059</b>                                                                                     | 28S Ribosomal protein S21, mitochondrial                                                                            | Mrps21          | 6 | 65,5 | 2,509061984 |
| <b>O88455</b>                                                                                     | 7-Dehydrocholesterol reductase                                                                                      | Dhcr7           | 6 | 15,9 | 2,272261634 |
| <b>Q9D023</b>                                                                                     | Mitochondrial pyruvate carrier 2                                                                                    | Mpc2            | 6 | 47,2 | 2,269749605 |
| <b>Q61070</b>                                                                                     | Etoposide-induced protein 2.4                                                                                       | Ei24            | 6 | 15,6 | 2,159615199 |
| <b>Q8C2Q3;<br/>J3QN51;<br/>B0LM42;<br/>F7BGR7</b>                                                 | RNA-binding protein 14                                                                                              | Rbm14           | 6 | 13   | 1,991782654 |
| <b>Q922J9</b>                                                                                     | Fatty acyl-CoA reductase 1                                                                                          | Far1            | 6 | 15,5 | 1,870304568 |
| <b>Q9CPW7</b>                                                                                     | Zinc-finger matrin-type protein 2                                                                                   | Zmat2           | 6 | 25,6 | 1,866563441 |
| <b>Q9R1C7</b>                                                                                     | Pre-mRNA-processing factor 40 homolog A                                                                             | Prpf40a         | 6 | 7,8  | 1,818505391 |

|                                               |                                                                                                                                 |               |   |      |             |
|-----------------------------------------------|---------------------------------------------------------------------------------------------------------------------------------|---------------|---|------|-------------|
| <b>Q5XJY5</b>                                 | Coatomer subunit delta                                                                                                          | Arcn1         | 6 | 17,8 | 1,804023843 |
| <b>Q80XU3</b>                                 | Nuclear ubiquitous casein and cyclin-dependent kinase substrate 1                                                               | Nucks1        | 6 | 24,8 | 1,702846216 |
| <b>Q6P3B9</b>                                 | Putative ribosome-binding factor A, mitochondrial                                                                               | Rbfa          | 6 | 25,4 | 1,5557011   |
| <b>Q60931</b>                                 | Voltage-dependent anion-selective channel protein 3                                                                             | Vdac3         | 6 | 21,6 | 1,552062861 |
| <b>Q9QYF1</b>                                 | Retinol dehydrogenase 11                                                                                                        | Rdh11         | 6 | 23,1 | 1,441371215 |
| <b>Q9CQU3</b>                                 | Protein RER1                                                                                                                    | Rer1          | 6 | 37,8 | 1,345395073 |
| <b>Q9D0F4;<br/>Q5SZT7</b>                     | NF-kappa-B-activating protein                                                                                                   | Nkap;Nkapl    | 6 | 16,1 | 1,295856175 |
| <b>P83882;<br/>A0A2I3BPG9;<br/>A0A0A6YW33</b> | 60S ribosomal protein L36a                                                                                                      | Rpl36a;Gm6525 | 6 | 27,4 | 1,288763667 |
| <b>P51880</b>                                 | Fatty acid-binding protein, brain                                                                                               | Fabp7         | 6 | 43,9 | 1,173321545 |
| <b>Q8BG32</b>                                 | 26S proteasome non-ATPase regulatory subunit 11                                                                                 | Psmd11        | 6 | 17,3 | 1,068507925 |
| <b>Q9CQ69</b>                                 | Cytochrome b-c1 complex subunit 8                                                                                               | Uqcrq         | 6 | 61   | 1,034471864 |
| <b>Q9EPJ9</b>                                 | ADP-ribosylation factor GTPase-activating protein 1                                                                             | Arfgap1       | 5 | 18,6 | 11,69252833 |
| <b>E9Q4F7</b>                                 |                                                                                                                                 | Ankrd11       | 5 | 2,4  | 11,63058567 |
| <b>Q9DBU6</b>                                 | Serine/arginine-related protein 53                                                                                              | Rsrc1         | 5 | 22,8 | 11,59781979 |
| <b>P97432</b>                                 | Next to BRCA1 gene 1 protein                                                                                                    | Nbr1          | 5 | 6,4  | 11,51412226 |
| <b>Q5HZI9</b>                                 | Solute carrier family 25 member 51                                                                                              | Slc25a51      | 5 | 19,1 | 11,40482225 |
| <b>Q07235</b>                                 | Glia-derived nexin                                                                                                              | Serpine2      | 5 | 14,6 | 11,26426665 |
| <b>Q922R8</b>                                 | Protein disulfide-isomerase A6                                                                                                  | Pdia6         | 5 | 23,2 | 11,23302043 |
| <b>P60122</b>                                 | RuvB-like 1                                                                                                                     | Ruvbl1        | 5 | 16,9 | 10,98598421 |
| <b>E9QAT4</b>                                 |                                                                                                                                 | Sec16a        | 5 | 3,3  | 10,95441444 |
| <b>Q69ZS7</b>                                 | HBS1-like protein                                                                                                               | Hbs1l         | 5 | 9,5  | 10,94097422 |
| <b>Q5U3K5</b>                                 | Rab-like protein 6                                                                                                              | Rabl6         | 5 | 8,8  | 10,90726625 |
| <b>P26039;<br/>Q71LX4</b>                     | Talin-1                                                                                                                         | Tln1          | 5 | 3,3  | 9,229179319 |
| <b>Q3TKT4</b>                                 | Transcription activator BRG1                                                                                                    | Smarca4       | 2 | 3,8  | 8,424754167 |
| <b>Q9D517</b>                                 | 1-acyl-sn-glycerol-3-phosphate acyltransferase gamma                                                                            | Agpat3        | 5 | 13,6 | 4,103219273 |
| <b>Q9DCN2</b>                                 | NADH-cytochrome b5 reductase 3; NADH-cytochrome b5 reductase 3 membrane-bound form; NADH-cytochrome b5 reductase 3 soluble form | Cyb5r3        | 5 | 22,3 | 3,947461779 |

|                                       |                                                                                                                                       |              |   |      |             |
|---------------------------------------|---------------------------------------------------------------------------------------------------------------------------------------|--------------|---|------|-------------|
| <b>P58021</b>                         | Transmembrane 9 superfamily member 2                                                                                                  | Tm9sf2       | 5 | 9,2  | 3,895936638 |
| <b>Q61598;<br/>P50396</b>             | Rab GDP dissociation inhibitor beta                                                                                                   | Gdi2         | 5 | 18,7 | 3,464047134 |
| <b>Q8BP92</b>                         | Reticulocalbin-2                                                                                                                      | Rcn2         | 5 | 19,1 | 3,335080677 |
| <b>Q7TN98;<br/>Q812E0;<br/>Q7TN99</b> | Cytoplasmic polyadenylation element-binding protein 4                                                                                 | Cpeb4        | 5 | 9,5  | 3,271948918 |
| <b>F6TVX7;<br/>Q8BSF4</b>             | Phosphatidylserine decarboxylase proenzyme; Phosphatidylserine decarboxylase alpha chain; Phosphatidylserine decarboxylase beta chain | Gm20671;Pisd | 5 | 11,8 | 3,182982998 |
| <b>Q8BLH7</b>                         | HIRA-interacting protein 3                                                                                                            | Hirip3       | 5 | 12,6 | 3,084734742 |
| <b>Q5HZG4</b>                         | Transcription initiation factor TFIID subunit 3                                                                                       | Taf3         | 5 | 7,7  | 2,6269542   |
| <b>Q8BK12</b>                         | Trinucleotide repeat-containing gene 6B protein                                                                                       | Tnrc6b       | 5 | 5    | 2,532729198 |
| <b>Q8R3N1</b>                         | Nucleolar protein 14                                                                                                                  | Nop14        | 5 | 7,4  | 2,513148161 |
| <b>Q3THK3</b>                         | General transcription factor IIF subunit 1                                                                                            | Gtf2f1       | 5 | 13,6 | 2,465057564 |
| <b>Q8R2M2</b>                         | Deoxynucleotidyltransferase terminal-interacting protein 2                                                                            | Dnttip2      | 5 | 8,3  | 2,433993768 |
| <b>Q8BP47</b>                         | Asparagine--tRNA ligase, cytoplasmic                                                                                                  | Nars         | 5 | 10,9 | 2,42619632  |
| <b>P70296</b>                         | Phosphatidylethanolamine-binding protein 1; Hippocampal cholinergic neurostimulating peptide                                          | Pebp1        | 5 | 44,9 | 2,366572398 |
| <b>Q99LC5</b>                         | Electron transfer flavoprotein subunit alpha, mitochondrial                                                                           | Etfa         | 5 | 22,2 | 2,227551819 |
| <b>Q91XC9</b>                         | Peroxisomal membrane protein PEX16                                                                                                    | Pex16        | 5 | 18,5 | 2,164524774 |
| <b>Q80VA0</b>                         | N-Acetylgalactosaminyltransferase 7                                                                                                   | Galnt7       | 5 | 13,4 | 2,036034347 |
| <b>Q3UUQ7</b>                         | GPI inositol-deacylase                                                                                                                | Pgap1        | 5 | 7,4  | 1,745372182 |
| <b>Q6ZPZ3</b>                         | Zinc-finger CCCH domain-containing protein 4                                                                                          | Zc3h4        | 5 | 8,5  | 1,694537053 |
| <b>E9PUQ3</b>                         |                                                                                                                                       | AU019823     | 5 | 20,2 | 1,544314993 |
| <b>Q99LY9</b>                         | NADH dehydrogenase [ubiquinone] iron-sulfur protein 5; NADH dehydrogenase [ubiquinone] iron-sulfur protein 5, N-terminally processed  | Ndufs5       | 5 | 28,3 | 1,34899142  |

|                       |                                                                                |          |   |      |             |
|-----------------------|--------------------------------------------------------------------------------|----------|---|------|-------------|
| <b>Q0VG62</b>         | Uncharacterized protein C8orf59 homolog                                        |          | 5 | 48,5 | 1,285845151 |
| <b>Q9D1F0</b>         |                                                                                | Cxx1a    | 5 | 33,6 | 1,253276192 |
| <b>Q9R1J0</b>         | Sterol-4-alpha-carboxylate 3-dehydrogenase, decarboxylating                    | Nsdhl    | 5 | 17,4 | 1,248456403 |
| <b>Q80UM3; Q9DBB4</b> | N-Alpha-acetyltransferase 15, NatA auxiliary subunit                           | Naa15    | 5 | 6,1  | 1,222759739 |
| <b>Q4QQM4</b>         | Tumor protein p53-inducible protein 11                                         | Trp53i11 | 5 | 24,3 | 1,222004418 |
| <b>Q8VCL2</b>         | Protein SCO2 homolog, mitochondrial                                            | Sco2     | 5 | 32,2 | 1,129699616 |
| <b>P35278; P61021</b> | Ras-related protein Rab-5C                                                     | Rab5c    | 3 | 27,3 | 1,087536163 |
| <b>Q64521</b>         | Glycerol-3-phosphate dehydrogenase, mitochondrial                              | Gpd2     | 5 | 7,6  | 1,06656929  |
| <b>Q9CPQ8</b>         | ATP synthase subunit g, mitochondrial                                          | Atp5l    | 5 | 47,6 | 1,047765484 |
| <b>P62849</b>         | 40S ribosomal protein S24                                                      | Rps24    | 5 | 30,1 | 1,00757959  |
| <b>Q99J99</b>         | 3-mercaptopyruvate sulfurtransferase                                           | Mpst     | 4 | 23,6 | 11,93129155 |
| <b>Q8VDP2</b>         | UPF0428 protein CXorf56 homolog                                                |          | 4 | 22,1 | 11,80207202 |
| <b>Q9CQV1</b>         | Mitochondrial import inner membrane translocase subunit TIM16                  | Pam16    | 4 | 49,6 | 11,76109408 |
| <b>Q8CI11</b>         | Guanine nucleotide-binding protein-like 3                                      | Gnl3     | 4 | 13,2 | 11,0146482  |
| <b>Q8VI75</b>         | Importin-4                                                                     | Ipo4     | 4 | 4,3  | 10,99604973 |
| <b>Q3TDQ1</b>         | Dolichyl-diphosphooligosaccharide-protein glycosyltransferase subunit STT3B    | Stt3b    | 4 | 7,7  | 10,97935374 |
| <b>Q8C163</b>         | Nuclease EXOG, mitochondrial                                                   | Exog     | 4 | 16,6 | 10,84509796 |
| <b>Q920Q6</b>         | RNA-binding protein Musashi homolog 2                                          | Msi2     | 4 | 13,9 | 10,84399954 |
| <b>Q02257</b>         | Junction plakoglobin                                                           | Jup      | 4 | 7,7  | 10,74155125 |
| <b>P35486</b>         | Pyruvate dehydrogenase E1 component subunit alpha, somatic form, mitochondrial | Pdha1    | 4 | 17,2 | 10,70856662 |
| <b>Q7TQ95</b>         | Protein lunapark                                                               | Lnp      | 4 | 13,2 | 10,69939894 |
| <b>Q3TFK5</b>         | G patch domain-containing protein 4                                            | Gpatch4  | 4 | 15,4 | 10,64015454 |
| <b>Q6ZPL9</b>         | ATP-dependent RNA helicase DDX55                                               | Ddx55    | 4 | 10,3 | 10,6319955  |



|                           |                                                                                            |          |   |      |             |
|---------------------------|--------------------------------------------------------------------------------------------|----------|---|------|-------------|
| <b>E9Q3G8</b>             |                                                                                            | Nup153   | 4 | 4,6  | 10,56814614 |
| <b>Q6PB66</b>             | Leucine-rich PPR motif-containing protein, mitochondrial                                   | Lrpprc   | 4 | 5    | 10,46454575 |
| <b>Q9DAW9</b>             | Calponin-3                                                                                 | Cnn3     | 4 | 17,3 | 10,25903704 |
| <b>Q8CJG0;<br/>Q8CJF9</b> | Protein argonaute-2                                                                        | Ago2     | 4 | 6,9  | 10,11022228 |
| <b>Q61749</b>             | Translation initiation factor eIF-2B subunit delta                                         | Eif2b4   | 4 | 13,2 | 10,09539702 |
| <b>Q64514</b>             | Tripeptidyl-peptidase 2                                                                    | Tpp2     | 4 | 3,6  | 10,09011242 |
| <b>A0A0J9YUD5</b>         |                                                                                            |          | 4 | 2,6  | 9,895014757 |
| <b>E9Q7X7</b>             |                                                                                            | Nrxn2    | 4 | 5,3  | 9,783996778 |
| <b>Q9R1T2</b>             | SUMO-activating enzyme subunit 1; SUMO-activating enzyme subunit 1, N-terminally processed | Sae1     | 4 | 19,7 | 9,686500527 |
| <b>Q9DBG3;<br/>O35643</b> | AP-2 complex subunit beta                                                                  | Ap2b1    | 4 | 5,8  | 9,643459394 |
| <b>Q9EQP2</b>             | EH domain-containing protein 4                                                             | Ehd4     | 3 | 8,1  | 9,287158278 |
| <b>Q99NB9</b>             | Splicing factor 3B subunit 1                                                               | Sf3b1    | 4 | 4,7  | 9,074328814 |
| <b>Q9D0M1</b>             | Phosphoribosyl pyrophosphate synthase-associated protein 1                                 | Prpsap1  | 4 | 15,4 | 8,840400288 |
| <b>Q8C6B9</b>             | Active regulator of SIRT1                                                                  | Rps19bp1 | 4 | 42   | 4,693739576 |
| <b>Q9CQ54</b>             | NADH dehydrogenase [ubiquinone] 1 subunit C2                                               | Ndufc2   | 4 | 20,8 | 4,53900926  |
| <b>Q921V5</b>             | Alpha-1,6-mannosyl-glycoprotein 2-beta-N-acetylglucosaminyltransferase                     | Mgat2    | 4 | 13,3 | 3,180016519 |
| <b>P61620;<br/>Q9JLR1</b> | Protein transport protein Sec61 subunit alpha isoform 1                                    | Sec61a1  | 4 | 10,9 | 2,774104687 |
| <b>Q8C150</b>             | Mediator of RNA polymerase II transcription subunit 19                                     | Med19    | 4 | 31,6 | 2,677165983 |
| <b>Q8BTU1</b>             | Cilia- and flagella-associated protein 20                                                  | Cfap20   | 4 | 25,4 | 2,491967475 |
| <b>P19258</b>             | Protein Mpv17                                                                              | Mpv17    | 4 | 25   | 2,203934832 |
| <b>Q924Z4</b>             | Ceramide synthase 2                                                                        | Cers2    | 4 | 11,3 | 2,128952547 |
| <b>P52293</b>             | Importin subunit alpha-1                                                                   | Kpna2    | 4 | 11,7 | 2,123164155 |
| <b>Q01721</b>             | Growth arrest-specific protein 1                                                           | Gas1     | 4 | 25,4 | 2,025649586 |
| <b>Q8R0A0</b>             | General transcription factor IIF subunit 2                                                 | Gtf2f2   | 4 | 22,5 | 1,988784564 |
| <b>P19783</b>             | Cytochrome c oxidase subunit 4 isoform 1, mitochondrial                                    | Cox4i1   | 4 | 30,8 | 1,890080375 |

|                                                   |                                                                                                                                                 |                     |   |      |             |
|---------------------------------------------------|-------------------------------------------------------------------------------------------------------------------------------------------------|---------------------|---|------|-------------|
| <b>Q9CXU9;<br/>P48024</b>                         | Eukaryotic translation initiation factor 1b; Eukaryotic translation initiation factor 1                                                         | Eif1b;Eif1          | 4 | 36,3 | 1,857085932 |
| <b>Q9ERS2</b>                                     | NADH dehydrogenase [ubiquinone] 1 alpha subcomplex subunit 13                                                                                   | Ndufa13             | 4 | 29,9 | 1,648583853 |
| <b>Q91VU0</b>                                     | Protein FAM3C                                                                                                                                   | Fam3c               | 4 | 17,6 | 1,568442268 |
| <b>A0A0J9YTR2</b>                                 |                                                                                                                                                 |                     | 4 | 38,9 | 1,521739224 |
| <b>Q60714</b>                                     | Long-chain fatty acid transport protein 1                                                                                                       | Slc27a1             | 4 | 11   | 1,515725525 |
| <b>Q9JIG8;<br/>A0A140LJ36</b>                     | PRA1 family protein 2                                                                                                                           | Praf2               | 4 | 20,8 | 1,443652639 |
| <b>P52912</b>                                     | Nucleolysin TIA-1                                                                                                                               | Tia1                | 4 | 22,8 | 1,358228368 |
| <b>Q9JKW0</b>                                     | ADP-ribosylation factor-like protein 6-interacting protein 1                                                                                    | Arl6ip1             | 4 | 16,7 | 1,189137625 |
| <b>Q99PL7;<br/>P13516;<br/>P13011;<br/>Q6T707</b> | Acyl-CoA desaturase 1;<br>Acyl-CoA desaturase 2                                                                                                 | Scd3;Scd1;Scd2;Scd4 | 4 | 7,2  | 1,164236982 |
| <b>Q8R127</b>                                     | Saccharopine dehydrogenase-like oxidoreductase                                                                                                  | Sccpdh              | 4 | 10   | 1,141404163 |
| <b>Q6PCM2</b>                                     | Integrator complex subunit 6                                                                                                                    | Ints6               | 4 | 5,3  | 1,047590042 |
| <b>P70213</b>                                     | Friend virus susceptibility protein 1                                                                                                           | Fv1                 | 4 | 12,4 | 1,034038461 |
| <b>Q9D6K8</b>                                     | FUN14 domain-containing protein 2                                                                                                               | Fundc2              | 3 | 23,2 | 12,81051139 |
| <b>Q8VD00</b>                                     | Transmembrane protein 97                                                                                                                        | Tmem97              | 3 | 15,9 | 12,45249866 |
| <b>Q80TJ7;<br/>Q9WTU0</b>                         | Histone lysine demethylase PHF8                                                                                                                 | Phf8                | 3 | 4,8  | 11,94251451 |
| <b>O35988</b>                                     | Syndecan-4                                                                                                                                      | Sdc4                | 3 | 19,7 | 11,93520189 |
| <b>P63330<br/>;P62715</b>                         | Serine/threonine-protein phosphatase 2A catalytic subunit alpha isoform; Serine/threonine-protein phosphatase 2A catalytic subunit beta isoform | Ppp2ca;<br>Ppp2cb   | 3 | 16,2 | 11,33594857 |
| <b>Q8C6C7</b>                                     | Protein FAM204A                                                                                                                                 | Fam204a             | 3 | 35,6 | 11,21377254 |
| <b>Q9ESX4</b>                                     | Nucleolar protein of 40 kDa                                                                                                                     | Zcchc17             | 3 | 13,3 | 11,08766173 |
| <b>Q4V9W2</b>                                     | Protein SREK1IP1                                                                                                                                | Srek1ip1            | 3 | 20,9 | 11,02292259 |
| <b>Q3UMM4</b>                                     | Cyclin-dependent kinase 10                                                                                                                      | Cdk10               | 3 | 9,7  | 10,95963976 |
| <b>Q91Z92</b>                                     | Beta-1,3-galactosyltransferase 6                                                                                                                | B3galt6             | 3 | 12,6 | 10,94434603 |
| <b>Q9CRB2</b>                                     | H/ACA ribonucleoprotein complex subunit 2                                                                                                       | Nhp2                | 3 | 28,1 | 10,89875253 |
| <b>P35979</b>                                     | 60S ribosomal protein L12                                                                                                                       | Rpl12               | 3 | 28,5 | 10,88218449 |

|                                                                           |                                                      |           |   |      |             |
|---------------------------------------------------------------------------|------------------------------------------------------|-----------|---|------|-------------|
| <b>Q9JJE4</b>                                                             | Progestin and adipoQ receptor family member 4        | Paqr4     | 3 | 11,7 | 10,87950667 |
| <b>Q8R5J9</b>                                                             | PRA1 family protein 3                                | Arl6ip5   | 3 | 19,7 | 10,85992297 |
| <b>P83510</b>                                                             | Traf2 and NCK-interacting protein kinase             | Tnik      | 3 | 6    | 10,60529431 |
| <b>Q9D5T0</b>                                                             | ATPase family AAA domain-containing protein 1        | Atad1     | 3 | 13,6 | 10,60334816 |
| <b>Q99N85</b>                                                             | 28S ribosomal protein S18a, mitochondrial            | Mrps18a   | 3 | 23   | 10,55276515 |
| <b>O35295;<br/>P42669</b>                                                 | Transcriptional activator protein Pur-beta           | Purb      | 3 | 17,9 | 10,51796459 |
| <b>Q9DA19</b>                                                             | Corepressor interacting with RBPJ 1                  | Cir1      | 3 | 11,3 | 10,47482133 |
| <b>O70480</b>                                                             | Vesicle-associated membrane protein 4                | Vamp4     | 3 | 23,4 | 10,4708622  |
| <b>Q9WU56</b>                                                             | tRNA pseudouridine synthase A, mitochondrial         | Pus1      | 3 | 10,6 | 10,43858396 |
| <b>Q8VCS3</b>                                                             | Glycosaminoglycan xylosylkinase                      | Fam20b    | 3 | 11   | 10,39446269 |
| <b>Q8K4F6</b>                                                             | Probable 28S rRNA (cytosine-C(5))-methyltransferase  | Nsun5     | 3 | 8,6  | 10,38963134 |
| <b>P16330</b>                                                             | 2,3-Cyclic-nucleotide 3-phosphodiesterase            | Cnp       | 3 | 12,1 | 10,38661698 |
| <b>Q6PHQ8</b>                                                             | N-alpha-acetyltransferase 35, NatC auxiliary subunit | Naa35     | 3 | 3,3  | 10,34340782 |
| <b>Q60598</b>                                                             | Src substrate cortactin                              | Cctn      | 3 | 9,9  | 10,3178648  |
| <b>Q9D0D4</b>                                                             | Probable dimethyladenosine transferase               | Dimt1     | 3 | 14,7 | 10,3089078  |
| <b>Q9DBJ1;<br/>O70250</b>                                                 | Phosphoglycerate mutase 1                            | Pgam1     | 3 | 20,5 | 10,29404631 |
| <b>P48432;<br/>Q04892;<br/>Q811W0;<br/>P53784;<br/>P53783;<br/>Q05738</b> | Transcription factor SOX-2                           | Sox2      | 3 | 13,5 | 10,28863541 |
| <b>Q9Z1R4</b>                                                             | Uncharacterized protein C6orf47 homolog              | D17h6s53e | 3 | 12,6 | 10,19229281 |
| <b>Q9DBM1</b>                                                             | G patch domain-containing protein 1                  | Gpatch1   | 3 | 5,7  | 10,1323712  |
| <b>E9PWG6</b>                                                             |                                                      | Ncapg     | 3 | 4,3  | 10,1048608  |
| <b>Q8BH24</b>                                                             | Transmembrane 9 superfamily member 4                 | Tm9sf4    | 3 | 6,2  | 10,10079373 |

|                           |                                                                                                                                               |                   |   |      |             |
|---------------------------|-----------------------------------------------------------------------------------------------------------------------------------------------|-------------------|---|------|-------------|
| <b>Q9CXI5</b>             | Mesencephalic astrocyte-derived neurotrophic factor                                                                                           | Manf              | 3 | 19   | 9,962809268 |
| <b>Q3U4G3</b>             | Xyloside xylosyltransferase 1                                                                                                                 | Xxylt1            | 3 | 7,9  | 9,961739073 |
| <b>Q921H8;<br/>Q8VCH0</b> | 3-Ketoacyl-CoA thiolase A, peroxisomal; 3-Ketoacyl-CoA thiolase B, peroxisomal                                                                | Acaa1a;<br>Acaa1b | 3 | 12,3 | 9,930486027 |
| <b>Q91XV3</b>             | Brain acid soluble protein 1                                                                                                                  | Basp1             | 3 | 25,7 | 9,724820777 |
| <b>Q69ZC8</b>             | GPALPP motifs-containing protein 1                                                                                                            | Gpalpp1           | 3 | 11   | 9,721834024 |
| <b>Q9QYE6</b>             | Golgin subfamily A member 5                                                                                                                   | Golga5            | 3 | 6,4  | 9,717950543 |
| <b>Q9R0H0</b>             | Peroxisomal acyl-coenzyme A oxidase 1                                                                                                         | Acox1             | 3 | 6,8  | 9,587852508 |
| <b>A2ASQ1</b>             | Agrin; Agrin N-terminal 110 kDa subunit; Agrin C-terminal 110 kDa subunit; Agrin C-terminal 90 kDa fragment; Agrin C-terminal 22 kDa fragment | Agrn              | 3 | 2,8  | 9,579202781 |
| <b>A2ACQ1</b>             |                                                                                                                                               | Dhx35             | 3 | 6,7  | 9,532044168 |
| <b>Q9DBR1</b>             | 5-3 Exoribonuclease 2                                                                                                                         | Xrn2              | 3 | 4,2  | 9,439934746 |
| <b>Q7TNL5</b>             |                                                                                                                                               | Ppp2r5d           | 3 | 6,2  | 9,322491538 |
| <b>P58501</b>             | PAX3- and PAX7-binding protein 1                                                                                                              | Paxbp1            | 3 | 3,9  | 9,25074845  |
| <b>Q921N6</b>             | Probable ATP-dependent RNA helicase DDX27                                                                                                     | Ddx27             | 3 | 4,7  | 9,062909607 |
| <b>Q8VI33;<br/>Q6NZA9</b> | Transcription initiation factor TFIID subunit 9                                                                                               | Taf9              | 3 | 21,2 | 8,748427688 |
| <b>P70372</b>             | ELAV-like protein 1                                                                                                                           | Elav1             | 3 | 9,5  | 8,700023496 |
| <b>Q8BI72</b>             | CDKN2A-interacting protein                                                                                                                    | Cdkn2aip          | 3 | 9,1  | 8,584248491 |
| <b>P13439</b>             | Uridine 5-monophosphate synthase; Orotate phosphoribosyltransferase; Orotidine 5-phosphate decarboxylase                                      | Umps              | 3 | 9,1  | 8,286557762 |
| <b>P46471</b>             | 26S protease regulatory subunit 7                                                                                                             | Psmc2             | 3 | 9,7  | 8,197216693 |
| <b>Q8VDF2;<br/>Q7TMI3</b> | E3 ubiquitin-protein ligase UHRF1                                                                                                             | Uhrf1             | 3 | 4,7  | 8,034578897 |
| <b>Q9EPE9</b>             | Manganese-transporting ATPase 13A1                                                                                                            | Atp13a1           | 3 | 3,3  | 7,272583133 |
| <b>P99028</b>             | Cytochrome b-c1 complex subunit 6, mitochondrial                                                                                              | Uqcrh             | 3 | 39,3 | 3,034816542 |
| <b>Q91XL3</b>             | UDP-glucuronic acid decarboxylase 1                                                                                                           | Uxs1              | 3 | 12,6 | 2,833976492 |
| <b>Q8R1I1</b>             | Cytochrome b-c1 complex subunit 9                                                                                                             | Uqcr10            | 3 | 39,1 | 2,334574151 |

|                                                                                               |                                                                   |             |   |      |             |
|-----------------------------------------------------------------------------------------------|-------------------------------------------------------------------|-------------|---|------|-------------|
| <b>Q6Y7W8</b>                                                                                 | PERQ amino acid-rich with GYF domain-containing protein 2         | Gigyf2      | 3 | 3,1  | 2,252557603 |
| <b>O35887</b>                                                                                 | Calumenin                                                         | Calu        | 3 | 12,7 | 2,140419788 |
| <b>Q6PGH1</b>                                                                                 | Protein BUD31 homolog                                             | Bud31       | 3 | 21,5 | 2,106633893 |
| <b>Q9ERY9</b>                                                                                 | Probable ergosterol biosynthetic protein 28                       | ORF11       | 3 | 22,9 | 2,071570855 |
| <b>D3Z4I3;<br/>Q62176</b>                                                                     | RNA-binding protein 24;<br>RNA-binding protein 38                 | Rbm24;Rbm38 | 3 | 16,1 | 1,956632027 |
| <b>Q8C1Q6</b>                                                                                 | Small integral membrane protein 4                                 | Smim4       | 3 | 30   | 1,81465017  |
| <b>Q5XKN4</b>                                                                                 | Protein jagunal homolog 1                                         | Jagn1       | 3 | 13,7 | 1,765369515 |
| <b>Q8VCH6</b>                                                                                 | Delta(24)-sterol reductase                                        | Dhcr24      | 3 | 5,6  | 1,718954272 |
| <b>Q9D8M4</b>                                                                                 | 60S Ribosomal protein L7-like 1                                   | Rpl7l1      | 3 | 15,9 | 1,587315747 |
| <b>Q91ZN5</b>                                                                                 | Adenosine 3-phospho 5-phosphosulfate transporter 1                | Slc35b2     | 3 | 8,1  | 1,494623142 |
| <b>Q9JKN5;<br/>Q6PFG8</b>                                                                     | Oligodendrocyte transcription factor 1                            | Olig1       | 2 | 13,1 | 1,48685709  |
| <b>O54825</b>                                                                                 | Bystin                                                            | Bysl        | 3 | 6,7  | 1,466149169 |
| <b>Q4FK66</b>                                                                                 | Pre-mRNA-splicing factor 38A                                      | Prpf38a     | 3 | 11,5 | 1,188896617 |
| <b>Q99JI6;<br/>P62835</b>                                                                     | Ras-related protein Rap-1b; Ras-related protein Rap-1A            | Rap1b;Rap1a | 3 | 17,9 | 1,110584115 |
| <b>Q66GT5</b>                                                                                 | Phosphatidylglycerophosphatase and protein-tyrosine phosphatase 1 | Ptpmt1      | 3 | 19,7 | 1,027166362 |
| <b>P10107</b>                                                                                 | Annexin A1                                                        | Anxa1       | 3 | 4,9  | 1,024739451 |
| <b>A0A1W2P7S8;<br/>Q6A068;A0A1<br/>W2P855;A0A1<br/>W2P7Z8;A0A1<br/>W2P7H4;A0A<br/>1W2P6Q8</b> | Cell division cycle 5-like protein                                | Cdc5l       | 3 | 5    | 1,012596516 |
| <b>Q8BGX2</b>                                                                                 | Uncharacterized protein C19orf52 homolog                          |             | 3 | 17,3 | 1,002431851 |
| <b>Q8K072</b>                                                                                 | Receptor expression-enhancing protein 4                           | Reep4       | 2 | 3,1  | 12,50695216 |
| <b>Q6A028</b>                                                                                 | Switch-associated protein 70                                      | Swap70      | 2 | 1,7  | 11,30714387 |
| <b>Q9WUK2</b>                                                                                 | Eukaryotic translation initiation factor 4H                       | Eif4h       | 2 | 12,9 | 11,29462075 |
| <b>Q9Z2N8</b>                                                                                 | Actin-like protein 6A                                             | Actl6a      | 2 | 10,3 | 11,20951429 |
| <b>Q8K363</b>                                                                                 | ATP-dependent RNA helicase DDX18                                  | Ddx18       | 2 | 3,5  | 11,1866714  |
| <b>D3Z3N4</b>                                                                                 |                                                                   | Hnrnp3      | 2 | 8,4  | 11,15690471 |
| <b>Q3UN02</b>                                                                                 | Lysocardiolipin acyltransferase 1                                 | Lclat1      | 2 | 9    | 11,08494123 |

|                                                                                           |                                                                                                                                                                                                                  |                     |   |      |             |
|-------------------------------------------------------------------------------------------|------------------------------------------------------------------------------------------------------------------------------------------------------------------------------------------------------------------|---------------------|---|------|-------------|
| <b>P01863;</b><br><b>P01865;</b><br><b>A0A0A6YY53;</b><br><b>F6TQW2;</b><br><b>P01864</b> | Ig gamma-2A chain C region, A allele; Ig gamma-2A chain C region, membrane-bound form; Ig gamma-2A chain C region secreted form                                                                                  | Ighg;Igh-1a;Ighg2c  | 2 | 10   | 11,07434219 |
| <b>Q9R0N7</b>                                                                             | Synaptotagmin-7                                                                                                                                                                                                  | Syt7                | 2 | 10,7 | 10,90425828 |
| <b>O09005</b>                                                                             | Sphingolipid delta(4)-desaturase DES1                                                                                                                                                                            | Degs1               | 2 | 10,5 | 10,84729229 |
| <b>Q9JIX0</b>                                                                             | Transcription and mRNA export factor ENY2                                                                                                                                                                        | Eny2                | 2 | 25,7 | 10,82472013 |
| <b>Q99PG2</b>                                                                             | Opioid growth factor receptor                                                                                                                                                                                    | Ogfr                | 2 | 4,3  | 10,68176549 |
| <b>Q60875</b>                                                                             | Rho guanine nucleotide exchange factor 2                                                                                                                                                                         | Arhgef2             | 2 | 3,5  | 10,55478069 |
| <b>Q9CQF8</b>                                                                             | Ribosomal protein 63, mitochondrial                                                                                                                                                                              | Mrpl57              | 2 | 13,7 | 10,52894242 |
| <b>Q9JJ61;</b><br><b>Q8BVG5</b>                                                           | Polypeptide N-acetylgalactosaminyltransferase 16; Polypeptide N-acetylgalactosaminyltransferase 14                                                                                                               | Galnt16;Galnt14     | 2 | 5,4  | 10,50898318 |
| <b>P42925</b>                                                                             | Peroxisomal membrane protein 2                                                                                                                                                                                   | Pxmp2               | 2 | 11,3 | 10,42143371 |
| <b>Q8BK08</b>                                                                             | Transmembrane protein 11, mitochondrial                                                                                                                                                                          | Tmem11              | 2 | 13,2 | 10,41500228 |
| <b>Q6TEK5</b>                                                                             | Vitamin K epoxide reductase complex subunit 1-like protein 1                                                                                                                                                     | Vkorc1l1            | 2 | 11,4 | 10,36763316 |
| <b>Q8R2L5</b>                                                                             | 28S Ribosomal protein S18c, mitochondrial                                                                                                                                                                        | Mrps18c             | 2 | 23,8 | 10,35060774 |
| <b>P62880</b>                                                                             | Guanine nucleotide-binding protein G(I)/G(S)/G(T) subunit beta-2                                                                                                                                                 | Gnb2                | 2 | 28,5 | 10,33516701 |
| <b>Q9CX30</b>                                                                             | Protein YIF1B                                                                                                                                                                                                    | Yif1b               | 2 | 10,9 | 10,3254179  |
| <b>Q9D880</b>                                                                             | Mitochondrial import inner membrane translocase subunit TIM50                                                                                                                                                    | Timm50              | 2 | 7,9  | 10,31015832 |
| <b>P21981</b>                                                                             | Protein-glutamine gamma-glutamyltransferase 2                                                                                                                                                                    | Tgm2                | 2 | 4,5  | 10,28655776 |
| <b>Q8JZX4</b>                                                                             | Splicing factor 45                                                                                                                                                                                               | Rbm17               | 2 | 6,4  | 10,27961058 |
| <b>Q8VDL4</b>                                                                             | ADP-dependent glucokinase                                                                                                                                                                                        | Adpgk               | 2 | 6    | 10,2769386  |
| <b>Q9JHN8</b>                                                                             | Serine/threonine-protein kinase 19                                                                                                                                                                               | Stk19               | 2 | 9,1  | 10,27286302 |
| <b>Q9Z2W1;</b><br><b>Q99JT2;</b><br><b>Q99KH8</b>                                         | Serine/threonine-protein kinase 25; Serine/threonine-protein kinase 26; Serine/threonine-protein kinase 24; Serine/threonine-protein kinase 24 35 kDa subunit; Serine/threonine-protein kinase 24 12 kDa subunit | Stk25; Stk26; Stk24 | 2 | 6,6  | 10,17130192 |

|                                       |                                                                                       |                |   |      |             |
|---------------------------------------|---------------------------------------------------------------------------------------|----------------|---|------|-------------|
| <b>Q9JIH2</b>                         | Nuclear pore complex protein Nup50                                                    | Nup50          | 2 | 6,9  | 10,11309098 |
| <b>O88271</b>                         | Craniofacial development protein 1                                                    | Cfdp1          | 2 | 12,5 | 10,11113567 |
| <b>Q6ZQI3</b>                         | Malectin                                                                              | Mlec           | 2 | 8,6  | 10,07921809 |
| <b>P99027</b>                         | 60S Acidic ribosomal protein P2                                                       | Rplp2          | 2 | 42,6 | 10,02652344 |
| <b>P35601</b>                         | Replication factor C subunit 1                                                        | Rfc1           | 2 | 2,8  | 10,00112667 |
| <b>O70579</b>                         | Peroxisomal membrane protein PMP34                                                    | Slc25a17       | 2 | 7,5  | 9,999718196 |
| <b>Q6PGG6</b>                         | Guanine nucleotide-binding protein-like 3-like protein                                | Gnl3l          | 2 | 5,5  | 9,9893945   |
| <b>Q9CR59</b>                         | Growth arrest and DNA damage-inducible proteins-interacting protein 1                 | Gadd45gip1     | 2 | 9,9  | 9,981567282 |
| <b>Q9CRD2</b>                         | ER membrane protein complex subunit 2                                                 | Emc2           | 2 | 8,4  | 9,980139578 |
| <b>Q3TKY6</b>                         | Peptidyl-prolyl cis-trans isomerase CWC27 homolog                                     | Cwc27          | 2 | 5,3  | 9,973697366 |
| <b>O35083</b>                         | 1-Acyl-sn-glycerol-3-phosphate acyltransferase alpha                                  | Agpat1         | 2 | 15,4 | 9,954618004 |
| <b>Q8BFV2</b>                         | PCI domain-containing protein 2                                                       | Pcid2          | 2 | 7    | 9,94966624  |
| <b>P61161</b>                         | Actin-related protein 2                                                               | Actr2          | 2 | 6,6  | 9,9408568   |
| <b>Q8BSL7;<br/>P84078;<br/>P61205</b> | ADP-ribosylation factor 2;<br>ADP-ribosylation factor 1;<br>ADP-ribosylation factor 3 | Arf2;Arf1;Arf3 | 2 | 34,3 | 9,932657681 |
| <b>Q9WTQ8</b>                         | Mitochondrial import inner membrane translocase subunit Tim23                         | Timm23         | 2 | 12,9 | 9,92982058  |
| <b>Q61166</b>                         | Microtubule-associated protein RP/EB family member 1                                  | Mapre1         | 2 | 14,2 | 9,891996295 |
| <b>Q8BHS6</b>                         | Armadillo repeat-containing X-linked protein 3                                        | Armxc3         | 2 | 7,4  | 9,87774425  |
| <b>Q9CWS0</b>                         | N(G),N(G)-dimethylarginine dimethylaminohydrolase 1                                   | Ddah1          | 2 | 12,6 | 9,873536393 |
| <b>Q922Q1</b>                         | Mitochondrial amidoxime reducing component 2                                          | 02-Mar         | 2 | 7,4  | 9,868591088 |
| <b>Q9ET30</b>                         | Transmembrane 9 superfamily member 3                                                  | Tm9sf3         | 2 | 3,6  | 9,863628773 |
| <b>Q8C4Q6</b>                         | Axin interactor, dorsalization-associated protein                                     | Aida           | 2 | 10,5 | 9,830340901 |
| <b>Q80YV2</b>                         | Nuclear-interacting partner of ALK                                                    | Zc3hc1         | 2 | 6,4  | 9,822554898 |
| <b>Q6P1J0</b>                         | Glycoprotein endo-alpha-1,2-mannosidase-like protein                                  | Maneal         | 2 | 7,1  | 9,808545942 |

|                                       |                                                                                                                                                                    |               |   |      |             |
|---------------------------------------|--------------------------------------------------------------------------------------------------------------------------------------------------------------------|---------------|---|------|-------------|
| <b>Q8C7X2</b>                         | ER membrane protein complex subunit 1                                                                                                                              | Emc1          | 2 | 4,7  | 9,789908534 |
| <b>O08529</b>                         | Calpain-2 catalytic subunit                                                                                                                                        | Capn2         | 2 | 3,7  | 9,782965457 |
| <b>Q9CQZ6</b>                         | NADH dehydrogenase [ubiquinone] 1 beta subcomplex subunit 3                                                                                                        | Ndufb3        | 2 | 18,3 | 9,767605145 |
| <b>Q8CB44</b>                         | GRAM domain-containing protein 4                                                                                                                                   | Gramd4        | 2 | 5,5  | 9,705079392 |
| <b>P24270</b>                         | Catalase                                                                                                                                                           | Cat           | 2 | 7,8  | 9,69115027  |
| <b>Q8K4R9</b>                         | Disks large-associated protein 5                                                                                                                                   | Dlgap5        | 2 | 2,2  | 9,68187088  |
| <b>Q91VT4</b>                         | Carbonyl reductase family member 4                                                                                                                                 | Cbr4          | 2 | 11   | 9,672036328 |
| <b>Q8CIL4</b>                         | Uncharacterized protein C1orf131 homolog                                                                                                                           |               | 2 | 8,9  | 9,659585674 |
| <b>Q8BXA5</b>                         | Cleft lip and palate transmembrane protein 1-like protein                                                                                                          | Clptm11       | 2 | 6,3  | 9,654206378 |
| <b>Q99KV1</b>                         | DnaJ homolog subfamily B member 11                                                                                                                                 | Dnajb11       | 2 | 8,7  | 9,640118378 |
| <b>Q8K0T0</b>                         | Reticulon-1                                                                                                                                                        | Rtn1          | 2 | 2,7  | 9,632468172 |
| <b>Q9CXG3</b>                         | Peptidyl-prolyl cis-trans isomerase-like 4                                                                                                                         | Ppil4         | 2 | 7,7  | 9,616199614 |
| <b>Q9DCJ7</b>                         | Aurora kinase A-interacting protein                                                                                                                                | Aurkaip1      | 2 | 7    | 9,5413677   |
| <b>Q922Q2</b>                         | Serine/threonine-protein kinase RIO1                                                                                                                               | Rio1          | 2 | 4,8  | 9,531283978 |
| <b>O35493;<br/>P22518</b>             | Dual specificity protein kinase CLK4;<br>Dual specificity protein kinase CLK1                                                                                      | Clk4;Clk1     | 2 | 6    | 9,44819892  |
| <b>Q9R099</b>                         | Transducin beta-like protein 2                                                                                                                                     | Tbl2          | 2 | 5,7  | 9,447971719 |
| <b>Q8VBT0</b>                         | Thioredoxin-related transmembrane protein 1                                                                                                                        | Tmx1          | 2 | 9    | 9,445056243 |
| <b>Q80W03;<br/>Q66JW3;<br/>Q8BU11</b> | TOX high mobility group box family member 3;<br>Thymocyte selection-associated high mobility group box protein TOX;<br>TOX high mobility group box family member 4 | Tox3;Tox;Tox4 | 2 | 4,3  | 9,417029691 |
| <b>Q3UHX9</b>                         | Putative methyltransferase C9orf114 homolog                                                                                                                        | D2Wsu81e      | 2 | 11,9 | 9,375669387 |
| <b>Q8BNI4</b>                         | Derlin-2                                                                                                                                                           | Derl2         | 2 | 17,2 | 9,373604714 |
| <b>Q8VBZ3</b>                         | Cleft lip and palate transmembrane protein 1 homolog                                                                                                               | Clptm1        | 2 | 7,5  | 9,362382216 |
| <b>P70404</b>                         | Isocitrate dehydrogenase [NAD] subunit gamma 1, mitochondrial                                                                                                      | Idh3g         | 2 | 9,2  | 9,328450541 |
| <b>Q06185</b>                         | ATP synthase subunit e, mitochondrial                                                                                                                              | Atp5i         | 2 | 32,4 | 9,279842694 |



|                           |                                                                                            |                   |   |      |             |
|---------------------------|--------------------------------------------------------------------------------------------|-------------------|---|------|-------------|
| <b>P30658</b>             | Chromobox protein homolog 2                                                                | Cbx2              | 2 | 5,6  | 9,277682605 |
| <b>Q00PI9</b>             | Heterogeneous nuclear ribonucleoprotein U-like protein 2                                   | Hnrnpul2          | 2 | 4,4  | 9,270902649 |
| <b>Q60864</b>             | Stress-induced-phosphoprotein 1                                                            | Stip1             | 2 | 7,6  | 9,23935985  |
| <b>Q8R3S6</b>             | Exocyst complex component 1                                                                | Exoc1             | 2 | 3    | 9,23570313  |
| <b>Q9CXW3</b>             | Calcyclin-binding protein                                                                  | Cacybp            | 2 | 13,5 | 9,156866799 |
| <b>Q61595</b>             | Kinectin                                                                                   | Ktn1              | 2 | 2    | 9,14407187  |
| <b>Q9QUR6</b>             | Prolyl endopeptidase                                                                       | Prep              | 2 | 4,2  | 9,124095457 |
| <b>Q922V4</b>             | Pleiotropic regulator 1                                                                    | Plrg1             | 2 | 6,8  | 9,096135325 |
| <b>P29758</b>             | Ornithine aminotransferase, mitochondrial                                                  | Oat               | 2 | 6,6  | 9,094526396 |
| <b>Q8VE70</b>             | Programmed cell death protein 10                                                           | Pdcd10            | 2 | 10,8 | 9,08976825  |
| <b>P68404</b>             | Protein kinase C beta type                                                                 | Prkcb             | 2 | 2,5  | 9,075211711 |
| <b>Q9WTR5</b>             | Cadherin-13                                                                                | Cdh13             | 2 | 3,6  | 9,047069367 |
| <b>Q9QYB1</b>             | Chloride intracellular channel protein 4                                                   | Clic4             | 2 | 15,8 | 9,041823396 |
| <b>Q9CW46</b>             | Ribonucleoprotein PTB-binding 1                                                            | Raver1            | 2 | 4,4  | 9,024973407 |
| <b>P34022</b>             | Ran-specific GTPase-activating protein                                                     | Ranbp1            | 2 | 16,7 | 9,014159989 |
| <b>Q8BGQ7</b>             | Alanine--tRNA ligase, cytoplasmic                                                          | Aars              | 2 | 2,9  | 9,01150682  |
| <b>P62492;<br/>P46638</b> | Ras-related protein Rab-11A;<br>Ras-related protein Rab-11B                                | Rab11a;<br>Rab11b | 2 | 11,1 | 8,996925364 |
| <b>Q91VE0</b>             | Long-chain fatty acid transport protein 4                                                  | Slc27a4           | 2 | 5,1  | 8,976019878 |
| <b>Q5RJG1</b>             | Nucleolar protein 10                                                                       | Nol10             | 2 | 3,2  | 8,958233692 |
| <b>E9QAP7;<br/>G5E8Z2</b> | Transcription initiation factor TFIID subunit 4B                                           | Taf4a;<br>Taf4b   | 2 | 4,1  | 8,929110432 |
| <b>Q9R1B9</b>             | Slit homolog 2 protein; Slit homolog 2 protein N-product; Slit homolog 2 protein C-product | Slit2             | 2 | 1,5  | 8,916655776 |
| <b>Q99LR1</b>             | Monoacylglycerol lipase ABHD12                                                             | Abhd12            | 2 | 4,3  | 8,832795097 |
| <b>Q99JT5</b>             | Lysine-rich coiled-coil protein 1                                                          | Krcc1             | 2 | 10,5 | 8,814262009 |
| <b>Q8CG48</b>             | Structural maintenance of chromosomes protein 2                                            | Smc2              | 2 | 2    | 8,810410969 |
| <b>Q9CRG1</b>             | Transmembrane 7 superfamily member 3                                                       | Tm7sf3            | 2 | 5    | 8,795877317 |
| <b>Q9JJK2</b>             | LanC-like protein 2                                                                        | Lancl2            | 2 | 7,1  | 8,78260514  |
| <b>P27601</b>             | Guanine nucleotide-binding protein subunit alpha-13                                        | Gna13             | 2 | 5,3  | 8,77603817  |
| <b>E9Q9Q2</b>             |                                                                                            | R3hdm1            | 2 | 2,4  | 8,74929961  |
| <b>Q8K205</b>             |                                                                                            | Pop1              | 2 | 2,8  | 8,73369328  |

|               |                                                                                                     |          |   |      |             |
|---------------|-----------------------------------------------------------------------------------------------------|----------|---|------|-------------|
| <b>Q3UGP8</b> | Putative Dol-P-Glc:Glc(2)Man(9)GlcNAc(2)-PP-Dol alpha-1,2-glucosyltransferase                       | Alg10b   | 2 | 4,2  | 8,712423824 |
| <b>P61982</b> | 14-3-3 Protein gamma; 14-3-3 protein gamma, N-terminally processed                                  | Ywhag    | 2 | 14,2 | 8,627606838 |
| <b>Q9CYN2</b> | Signal peptidase complex subunit 2                                                                  | Spcs2    | 2 | 13,3 | 8,601622241 |
| <b>Q91WQ5</b> | TAF5-like RNA polymerase II p300/CBP-associated factor-associated factor 65 kDa subunit 5L          | Taf5l    | 2 | 3,7  | 8,587815013 |
| <b>Q9ER73</b> | Elongator complex protein 4                                                                         | Elp4     | 2 | 6,6  | 8,514871825 |
| <b>Q6PDG5</b> | SWI/SNF complex subunit SMARCC2                                                                     | Smrcc2   | 2 | 3,7  | 8,502036164 |
| <b>P16546</b> | Spectrin alpha chain, non-erythrocytic 1                                                            | Sptan1   | 2 | 1,3  | 8,492574264 |
| <b>Q8K2V6</b> | Importin-11                                                                                         | Ipo11    | 2 | 2,4  | 8,485306061 |
| <b>Q8CCP0</b> | Nuclear export mediator factor Nemf                                                                 | Nemf     | 2 | 1,9  | 8,444932049 |
| <b>Q6P5B0</b> | RRP12-like protein                                                                                  | Rrp12    | 2 | 1,9  | 8,426306693 |
| <b>Q9Z1M8</b> | Protein Red                                                                                         | Ik       | 2 | 5,2  | 8,418611628 |
| <b>P09021</b> | Homeobox protein Hox-A5                                                                             | Hoxa5    | 2 | 13   | 8,396390716 |
| <b>P28352</b> | DNA-(apurinic or apyrimidinic site) lyase; DNA-(apurinic or apyrimidinic site) lyase, mitochondrial | Apex1    | 2 | 10,7 | 8,340117144 |
| <b>Q921T2</b> | Torsin-1A-interacting protein 1                                                                     | Tor1aip1 | 2 | 5,4  | 8,147357583 |
| <b>P05201</b> | Aspartate aminotransferase, cytoplasmic                                                             | Got1     | 2 | 9    | 8,1094128   |
| <b>Q9CQY6</b> | Ubiquinol-cytochrome-c reductase complex assembly factor 2                                          | Uqc2     | 2 | 18,4 | 8,096240766 |
| <b>Q9CZX9</b> | ER membrane protein complex subunit 4                                                               | Emc4     | 2 | 15,8 | 7,912769606 |
| <b>Q6ZQ11</b> | Chondroitin sulfate synthase 1                                                                      | Chsy1    | 2 | 4,6  | 7,654993973 |
| <b>Q9JHS4</b> | ATP-dependent Clp protease ATP-binding subunit clpX-like, mitochondrial                             | Clpx     | 2 | 4,4  | 7,632413641 |
| <b>Q8R2K4</b> | TAF6-like RNA polymerase II p300/CBP-associated factor-associated factor 65 kDa subunit 6L          | Taf6l    | 2 | 3,2  | 7,447083226 |
| <b>O88738</b> | Baculoviral IAP repeat-containing protein 6                                                         | Birc6    | 2 | 0,7  | 7,362206855 |
| <b>P26883</b> | Peptidyl-prolyl cis-trans isomerase FKBP1A                                                          | Fkbp1a   | 2 | 25   | 7,275938239 |

|                                       |                                                                                                                 |                       |   |      |             |
|---------------------------------------|-----------------------------------------------------------------------------------------------------------------|-----------------------|---|------|-------------|
| <b>Q7TMS5</b>                         | ATP-binding cassette sub-family G member 2                                                                      | Abcg2                 | 2 | 3,3  | 7,231605208 |
| <b>Q9CQ92</b>                         | Mitochondrial fission 1 protein                                                                                 | Fis1                  | 2 | 15,8 | 7,111865964 |
| <b>J3QN89</b>                         |                                                                                                                 | Aamp                  | 2 | 6    | 7,018144529 |
| <b>Q80YX1</b>                         | Tenascin                                                                                                        | Tnc                   | 2 | 0,9  | 6,885330315 |
| <b>E9PY39;<br/>Q9D2M8;<br/>Q9CZY3</b> | Ubiquitin-conjugating enzyme E2 variant 2; Ubiquitin-conjugating enzyme E2 variant 1                            | Gm20431;Ube2v2;Ube2v1 | 2 | 4,9  | 6,864557606 |
| <b>Q99MN1</b>                         | Lysine--tRNA ligase                                                                                             | Kars                  | 2 | 4,4  | 6,28771238  |
| <b>Q9Z1B3</b>                         | 1-Phosphatidylinositol 4,5-bisphosphate phosphodiesterase beta-1                                                | Plcb1                 | 2 | 2,1  | 6,159649367 |
| <b>P10711</b>                         | Transcription elongation factor A protein 1                                                                     | Tcea1                 | 2 | 8,3  | 6,066369089 |
| <b>Q9ERA6</b>                         | Tuftelin-interacting protein 11                                                                                 | Tfip11                | 2 | 2,5  | 2,228093832 |
| <b>Q9D8Y1</b>                         | Transmembrane protein 126A                                                                                      | Tmem126a              | 2 | 10,7 | 1,729130444 |
| <b>Q91Z67</b>                         | SLIT-ROBO Rho GTPase-activating protein 2                                                                       | Srgap2                | 2 | 2,1  | 1,640905387 |
| <b>P32883;<br/>Q61411;<br/>P08556</b> | GTPase KRas; GTPase KRas, N-terminally processed; GTPase HRas; GTPase HRas, N-terminally processed; GTPase NRas | Kras;Hras;Nras        | 2 | 14,3 | 1,618021121 |
| <b>Q9D958</b>                         | Signal peptidase complex subunit 1                                                                              | Spcs1                 | 2 | 8,1  | 1,589935265 |
| <b>Q6NSU3</b>                         | Glycosyltransferase 8 domain-containing protein 1                                                               | Glt8d1                | 2 | 10,5 | 1,545176719 |
| <b>Q05186</b>                         | Reticulocalbin-1                                                                                                | Rcn1                  | 2 | 9,8  | 1,377897302 |
| <b>D6RFQ2;<br/>Q9Z210</b>             | Peroxisomal membrane protein 11B                                                                                | Pex11b                | 2 | 5,7  | 1,357120292 |
| <b>Q78ZA7</b>                         | Nucleosome assembly protein 1-like 4                                                                            | Nap1l4                | 2 | 12,3 | 1,279833488 |
| <b>Q8K003</b>                         | Translation machinery-associated protein 7                                                                      | Tma7                  | 2 | 21,9 | 1,275175419 |
| <b>O09061</b>                         | Proteasome subunit beta type-1                                                                                  | Psmb1                 | 2 | 14,2 | 1,267559071 |
| <b>G5E870</b>                         | E3 ubiquitin-protein ligase TRIP12                                                                              | Trip12                | 2 | 1,1  | 1,183619729 |
| <b>Q9DCF9</b>                         | Translocon-associated protein subunit gamma                                                                     | Ssr3                  | 2 | 9,7  | 1,141664419 |
| <b>Q9D2R8</b>                         | 28S Ribosomal protein S33, mitochondrial                                                                        | Mrps33                | 2 | 19,8 | 1,123106684 |
| <b>Q9CPQ1</b>                         | Cytochrome c oxidase subunit 6C                                                                                 | Cox6c                 | 2 | 26,3 | 1,121314918 |
| <b>Q8QZR8</b>                         | Cyclin-related protein FAM58B                                                                                   | Fam58b                | 2 | 9,6  | 1,057076052 |
| <b>Q9CQ60</b>                         | 6-Phosphogluconolactonase                                                                                       | Pgls                  | 2 | 11,7 | 1,021826876 |

|                           |                                                                                |               |   |      |             |
|---------------------------|--------------------------------------------------------------------------------|---------------|---|------|-------------|
| <b>Q78TU8</b>             |                                                                                | Fam107a       | 1 | 6,2  | 12,27125875 |
| <b>P01872</b>             | Ig mu chain C region                                                           | Ighm          | 1 | 2,2  | 11,64218711 |
| <b>Q9ES97</b>             | Reticulon-3                                                                    | Rtn3          | 1 | 1,1  | 11,07547915 |
| <b>Q91VS7</b>             | Microsomal glutathione S-transferase 1                                         | Mgst1         | 1 | 10,3 | 10,74011804 |
| <b>Q5RL79</b>             | Keratinocyte-associated protein 2                                              | Krtcap2       | 1 | 12,5 | 10,63608079 |
| <b>Q9Z0S9</b>             | Prenylated Rab acceptor protein 1                                              | Rabac1        | 1 | 7,6  | 10,52816105 |
| <b>Q3KNM2</b>             | E3 ubiquitin-protein ligase MARCH5                                             | 05-Mar        | 1 | 5,8  | 10,45296189 |
| <b>P61804</b>             | Dolichyl-diphosphooligosaccharide-protein glycosyltransferase subunit DAD1     | Dad1          | 1 | 10,6 | 10,32305476 |
| <b>P31648</b>             | Sodium- and chloride-dependent GABA transporter 1                              | Slc6a1        | 1 | 3,5  | 10,30571978 |
| <b>P70202</b>             | Latexin                                                                        | Lxn           | 1 | 8,1  | 10,23038076 |
| <b>P62996</b>             | Transformer-2 protein homolog beta                                             | Tra2b         | 1 | 3,5  | 10,20518233 |
| <b>Q9ESK9</b>             | RB1-inducible coiled-coil protein 1                                            | Rb1cc1        | 1 | 0,7  | 10,17180229 |
| <b>Q9DBZ5</b>             | Eukaryotic translation initiation factor 3 subunit K                           | Eif3k         | 1 | 6,4  | 10,0558247  |
| <b>P01867</b>             | Ig Gamma-2B chain C region                                                     | Igh-3         | 1 | 4    | 10,05080096 |
| <b>Q9ERN0</b>             | Secretory carrier-associated membrane protein 2                                | Scamp2        | 1 | 3,6  | 9,899477772 |
| <b>Q9NWG9</b>             | Melanoma-associated antigen H1                                                 | Mageh1        | 1 | 9,2  | 9,896559463 |
| <b>Q3UHX2</b>             | 28-kDa Heat- and acid-stable phosphoprotein                                    | Pdap1         | 1 | 7,2  | 9,800721978 |
| <b>Q9R0M8</b>             | UDP-galactose translocator                                                     | Slc35a2       | 1 | 2,8  | 9,738700293 |
| <b>P97384</b>             | Annexin A11                                                                    | Anxa11        | 1 | 1,8  | 9,718001935 |
| <b>Q8R404</b>             | Protein QIL1                                                                   | Qil1          | 1 | 5,9  | 9,679198571 |
| <b>Q791V5</b>             | Mitochondrial carrier homolog 2                                                | Mtch2         | 1 | 3    | 9,667608326 |
| <b>Q9CQA6</b>             | Coiled-coil-helix-coiled-coil-helix domain-containing protein 1                | Chchd1        | 1 | 9,3  | 9,629775524 |
| <b>P61211</b>             | ADP-ribosylation factor-like protein 1                                         | Arl1          | 1 | 6,1  | 9,502632935 |
| <b>P49586;<br/>Q811Q9</b> | Choline-phosphate cytidyltransferase A; Choline-phosphate cytidyltransferase B | Pcyt1a;Pcyt1b | 1 | 3,3  | 9,49026927  |
| <b>P70699</b>             | Lysosomal alpha-glucosidase                                                    | Gaa           | 1 | 2,4  | 9,48058827  |
| <b>Q8K1A5</b>             | Transmembrane protein 41B                                                      | Tmem41b       | 1 | 6,2  | 9,448013031 |
| <b>Q8CGI1</b>             | Protein FAM193A                                                                | Fam193a       | 1 | 1    | 9,447041888 |
| <b>P27612</b>             | Phospholipase A-2-activating protein                                           | Plaa          | 1 | 3    | 9,43812648  |
| <b>Q9ES89</b>             | Exostosin-like 2                                                               | Extl2         | 1 | 3,3  | 9,399213827 |

|                           |                                                                                    |               |   |      |             |
|---------------------------|------------------------------------------------------------------------------------|---------------|---|------|-------------|
| <b>P70202</b>             | Latexin                                                                            | Lxn           | 1 | 8,1  | 10,23038076 |
| <b>P62996</b>             | Transformer-2 protein homolog beta                                                 | Tra2b         | 1 | 3,5  | 10,20518233 |
| <b>Q9ESK9</b>             | RB1-inducible coiled-coil protein 1                                                | Rb1cc1        | 1 | 0,7  | 10,17180229 |
| <b>Q9DBZ5</b>             | Eukaryotic translation initiation factor 3 subunit K                               | Eif3k         | 1 | 6,4  | 10,0558247  |
| <b>P01867</b>             | Ig Gamma-2B chain C region                                                         | Igh-3         | 1 | 4    | 10,05080096 |
| <b>Q9ERN0</b>             | Secretory carrier-associated membrane protein 2                                    | Scamp2        | 1 | 3,6  | 9,899477772 |
| <b>Q9NWG9</b>             | Melanoma-associated antigen H1                                                     | Mageh1        | 1 | 9,2  | 9,896559463 |
| <b>Q3UHX2</b>             | 28-kDa Heat- and acid-stable phosphoprotein                                        | Pdap1         | 1 | 7,2  | 9,800721978 |
| <b>Q9R0M8</b>             | UDP-galactose translocator                                                         | Slc35a2       | 1 | 2,8  | 9,738700293 |
| <b>P97384</b>             | Annexin A11                                                                        | Anxa11        | 1 | 1,8  | 9,718001935 |
| <b>Q8R404</b>             | Protein QIL1                                                                       | Qil1          | 1 | 5,9  | 9,679198571 |
| <b>Q791V5</b>             | Mitochondrial carrier homolog 2                                                    | Mtch2         | 1 | 3    | 9,667608326 |
| <b>Q9CQA6</b>             | Coiled-coil-helix-coiled-coil-helix domain-containing protein 1                    | Chchd1        | 1 | 9,3  | 9,629775524 |
| <b>P61211</b>             | ADP-ribosylation factor-like protein 1                                             | Arl1          | 1 | 6,1  | 9,502632935 |
| <b>P49586;<br/>Q811Q9</b> | Choline-phosphate cytidylyltransferase A; Choline-phosphate cytidylyltransferase B | Pcyt1a;Pcyt1b | 1 | 3,3  | 9,49026927  |
| <b>P70699</b>             | Lysosomal alpha-glucosidase                                                        | Gaa           | 1 | 2,4  | 9,48058827  |
| <b>Q8K1A5</b>             | Transmembrane protein 41B                                                          | Tmem41b       | 1 | 6,2  | 9,448013031 |
| <b>Q8CGI1</b>             | Protein FAM193A                                                                    | Fam193a       | 1 | 1    | 9,447041888 |
| <b>P27612</b>             | Phospholipase A-2-activating protein                                               | Plaa          | 1 | 3    | 9,43812648  |
| <b>Q9ES89</b>             | Exostosin-like 2                                                                   | Extl2         | 1 | 3,3  | 9,399213827 |
| <b>Q61387</b>             | Cytochrome c oxidase subunit 7A-related protein, mitochondrial                     | Cox7a2l       | 1 | 28,8 | 9,398145117 |
| <b>Q99JT6</b>             | Calfacitin                                                                         | Tlcd1         | 1 | 3,6  | 9,366562643 |
| <b>Q8CJG1</b>             | Protein argonaute-1                                                                | Ago1          | 1 | 1,4  | 9,33621643  |
| <b>Q9JLV2</b>             | Short transient receptor potential channel 4-associated protein                    | Trpc4ap       | 1 | 4    | 9,332551305 |
| <b>Q9CQ90</b>             | Uncharacterized protein C9orf85 homolog                                            |               | 1 | 16,8 | 9,30058136  |
| <b>P16332</b>             | Methylmalonyl-CoA mutase, mitochondrial                                            | Mut           | 1 | 2,4  | 9,285956995 |
| <b>P47802</b>             | Metaxin-1                                                                          | Mtx1          | 1 | 5    | 9,277752336 |
| <b>Q9DC29</b>             | ATP-binding cassette sub-family B member 6, mitochondrial                          | Abcb6         | 1 | 2,6  | 9,249990421 |

|                           |                                                                                     |               |   |      |             |
|---------------------------|-------------------------------------------------------------------------------------|---------------|---|------|-------------|
| <b>Q9Z2A7</b>             | Diacylglycerol O-acyltransferase 1                                                  | Dgat1         | 1 | 8,4  | 9,230692976 |
| <b>Q6URW6</b>             | Myosin-14                                                                           | Myh14         | 1 | 1,9  | 9,206208529 |
| <b>Q91VP7</b>             | Transmembrane protein 101                                                           | Tmem101       | 1 | 3,5  | 9,200015803 |
| <b>Q8R1Z9</b>             | RING finger protein 121                                                             | Rnf121        | 1 | 4    | 9,158761144 |
| <b>P60003</b>             | Transcription elongation factor 1 homolog                                           | Elof1         | 1 | 21,7 | 9,157094252 |
| <b>Q8JZS9</b>             | 39S Ribosomal protein L48, mitochondrial                                            | Mrpl48        | 1 | 5,2  | 9,144556282 |
| <b>Q99ME2</b>             | WD repeat-containing protein 6                                                      | Wdr6          | 1 | 3,2  | 9,097874115 |
| <b>Q9D0W5</b>             | Peptidyl-prolyl cis-trans isomerase-like 1                                          | Ppil1         | 1 | 10,2 | 9,095871689 |
| <b>P46061</b>             | Ran GTPase-activating protein 1                                                     | Rangap1       | 1 | 2    | 9,063206305 |
| <b>A2BH40</b>             | AT-rich interactive domain-containing protein 1A                                    | Arid1a        | 1 | 0,9  | 9,030004945 |
| <b>Q9JKN1</b>             | Zinc transporter 7                                                                  | Slc30a7       | 1 | 2,6  | 8,964514154 |
| <b>Q9EP78</b>             | Carbohydrate sulfotransferase 7                                                     | Chst7         | 1 | 2,7  | 8,961102364 |
| <b>Q9JKD3</b>             | Secretory carrier-associated membrane protein 5                                     | Scamp5        | 1 | 3,8  | 8,95991502  |
| <b>O70274;<br/>Q63739</b> | Protein tyrosine phosphatase type IVA 2;<br>Protein tyrosine phosphatase type IVA 1 | Ptp4a2;Ptp4a1 | 1 | 8,4  | 8,959393438 |
| <b>Q8CB77</b>             | Transcription elongation factor B polypeptide 3                                     | Tceb3         | 1 | 1,9  | 8,943393929 |
| <b>Q2PMX6</b>             |                                                                                     | Dmrtc1b       | 1 | 4,5  | 8,934929248 |
| <b>Q9JLJ5</b>             | Elongation of very long chain fatty acids protein 1                                 | Elovl1        | 1 | 4,3  | 8,922970853 |
| <b>Q9CQD1</b>             | Ras-related protein Rab-5A                                                          | Rab5a         | 1 | 15,3 | 8,913308315 |
| <b>Q91YW3</b>             | DnaJ homolog subfamily C member 3                                                   | Dnajc3        | 1 | 3,4  | 8,912021063 |
| <b>Q8JZM0</b>             | Dimethyladenosine transferase 1, mitochondrial                                      | Tfb1m         | 1 | 4,3  | 8,909923077 |
| <b>Q9DAJ4</b>             | WD repeat domain-containing protein 83                                              | Wdr83         | 1 | 5,4  | 8,907852072 |
| <b>P55821</b>             | Stathmin-2                                                                          | Stmn2         | 1 | 5,6  | 8,888621497 |
| <b>Q99J09</b>             | Methylosome protein 50                                                              | Wdr77         | 1 | 5    | 8,886946371 |
| <b>Q01279</b>             | Epidermal growth factor receptor                                                    | Egfr          | 1 | 1,6  | 8,886245286 |
| <b>P05977;<br/>P09542</b> | Myosin light chain 1/3, skeletal muscle isoform; Myosin light chain 3               | Myl1;Myl3     | 1 | 8,5  | 8,878112237 |
| <b>O08912</b>             | Polypeptide N-acetylgalactosaminyltransferase 1;                                    | Galnt1        | 1 | 4,7  | 8,871165994 |

|                           |                                                               |             |   |     |             |
|---------------------------|---------------------------------------------------------------|-------------|---|-----|-------------|
|                           | Polypeptide N-acetylgalactosaminyltransferase 1 soluble form  |             |   |     |             |
| <b>Q3V1T4</b>             | Prolyl 3-hydroxylase 1                                        | Lepre1      | 1 | 1,6 | 8,819604323 |
| <b>Q8BGT7</b>             | Survival of motor neuron-related-splicing factor 30           | Smndc1      | 1 | 8,8 | 8,812786992 |
| <b>P61924</b>             | Coatomer subunit zeta-1                                       | Copz1       | 1 | 13  | 8,809092838 |
| <b>Q9QYI6</b>             | DnaJ homolog subfamily B member 9                             | Dnajb9      | 1 | 5,4 | 8,807419327 |
| <b>Q8BLK3</b>             | Limbic system-associated membrane protein                     | Lsamp       | 1 | 3,2 | 8,806517401 |
| <b>Q8BG51</b>             | Mitochondrial Rho GTPase 1                                    | Rhot1       | 1 | 2,4 | 8,787478175 |
| <b>Q64310</b>             | Surfeit locus protein 4                                       | Surf4       | 1 | 4,8 | 8,781162969 |
| <b>Q8CEE7</b>             | Retinol dehydrogenase 13                                      | Rdh13       | 1 | 5,1 | 8,770531757 |
| <b>P28474</b>             | Alcohol dehydrogenase class-3                                 | Adh5        | 1 | 4,5 | 8,765833067 |
| <b>Q8CHP5</b>             | Partner of Y14 and mago                                       | Wibg        | 1 | 7,9 | 8,7601544   |
| <b>Q8VIK2</b>             | Mpv17-like protein 2                                          | Mpv17l2     | 1 | 6,5 | 8,756589679 |
| <b>P59325</b>             | Eukaryotic translation initiation factor 5                    | Eif5        | 1 | 2,3 | 8,756189348 |
| <b>Q9DCI3</b>             | MLN64 N-terminal domain homolog                               | Stard3nl    | 1 | 4,3 | 8,750974902 |
| <b>Q8BGQ1</b>             | Spermatogenesis-defective protein 39 homolog                  | Vipas39     | 1 | 3,9 | 8,74819285  |
| <b>Q80Y32</b>             |                                                               | Hmgxb4      | 1 | 2,9 | 8,737382563 |
| <b>Q8BX10</b>             | Serine/threonine-protein phosphatase PGAM5, mitochondrial     | Pgam5       | 1 | 3,5 | 8,717573615 |
| <b>Q6PGB8</b>             | Probable global transcription activator SNF2L1                | Smarca1     | 1 | 1,3 | 8,701445093 |
| <b>P17427;<br/>P17426</b> | AP-2 complex subunit alpha-2;<br>AP-2 complex subunit alpha-1 | Ap2a2;Ap2a1 | 1 | 1   | 8,651733401 |
| <b>P70671</b>             | Interferon regulatory factor 3                                | Irf3        | 1 | 4,8 | 8,65047737  |
| <b>O35623</b>             | BET1 homolog                                                  | Bet1        | 1 | 9,3 | 8,650118303 |
| <b>Q6ZQ29</b>             | Serine/threonine-protein kinase TAO2                          | Taok2       | 1 | 2,3 | 8,64731451  |
| <b>P08551</b>             | Neurofilament light polypeptide                               | Nefl        | 1 | 5   | 8,627716262 |
| <b>Q9CQW7</b>             | Apoptogenic protein 1, mitochondrial                          | Apopt1      | 1 | 9,4 | 8,616953109 |
| <b>P03899</b>             | NADH-ubiquinone oxidoreductase chain 3                        | Mtnd3       | 1 | 13  | 8,610323573 |
| <b>O70310</b>             | Glycylpeptide N-tetradecanoyltransferase 1                    | Nmt1        | 1 | 2,6 | 8,6043679   |
| <b>Q06831</b>             | Transcription factor SOX-4                                    | Sox4        | 1 | 5,9 | 8,600804955 |

|                                       |                                                                                                                                               |                       |   |      |             |
|---------------------------------------|-----------------------------------------------------------------------------------------------------------------------------------------------|-----------------------|---|------|-------------|
| <b>Q9D1Q4</b>                         | Dolichol-phosphate<br>mannosyltransferase subunit 3                                                                                           | Dpm3                  | 1 | 10,9 | 8,599950025 |
| <b>D3YZZ5</b>                         |                                                                                                                                               | Tmed7                 | 1 | 4,5  | 8,585713709 |
| <b>Q6P5F7</b>                         | Protein tweety homolog 3                                                                                                                      | Ttyh3                 | 1 | 2,7  | 8,578863256 |
| <b>P84096</b>                         | Rho-related GTP-binding protein<br>RhoG                                                                                                       | Rhog                  | 1 | 9,9  | 8,557119022 |
| <b>Q3TBW2</b>                         | 39S ribosomal protein L10,<br>mitochondrial                                                                                                   | Mrpl10                | 1 | 5,7  | 8,539507808 |
| <b>Q80U78</b>                         | Pumilio homolog 1                                                                                                                             | Pum1                  | 1 | 1,7  | 8,531420452 |
| <b>Q8K0D7</b>                         | Tail-anchored protein insertion<br>receptor WRB                                                                                               | Wrb                   | 1 | 6,9  | 8,523757961 |
| <b>Q8BUN5;<br/>Q9JIW5;<br/>Q62432</b> | Mothers against decapentaplegic<br>homolog 3; Mothers against<br>decapentaplegic homolog 9; Mothers<br>against decapentaplegic homolog 2      | Smad3;Sma<br>d9;Smad2 | 1 | 3,1  | 8,518771163 |
| <b>P50247</b>                         | Adenosylhomocysteinase                                                                                                                        | Ahcy                  | 1 | 2,5  | 8,517826836 |
| <b>Q149F3;<br/>Q8R050</b>             | Eukaryotic peptide chain release<br>factor GTP-binding subunit ERF3B;<br>Eukaryotic peptide chain release<br>factor GTP-binding subunit ERF3A | Gspt2;Gspt1           | 1 | 2,8  | 8,516921276 |
| <b>P84102;<br/>O88892</b>             | Small EDRK-rich factor 2;<br>Small EDRK-rich factor 1                                                                                         | Serf2;Serf1           | 1 | 13,6 | 8,503189699 |
| <b>Q9CZX5</b>                         | PIN2/TERF1-interacting telomerase<br>inhibitor 1                                                                                              | Pinx1                 | 1 | 5,7  | 8,502792032 |
| <b>Q8BHN0</b>                         | Protein phosphatase 1L                                                                                                                        | Ppm1l                 | 1 | 3,6  | 8,499845887 |
| <b>Q99P72</b>                         | Reticulon-4                                                                                                                                   | Rtn4                  | 1 | 2,7  | 8,49589499  |
| <b>Q9D8B4</b>                         | NADH dehydrogenase [ubiquinone]<br>1 alpha subcomplex subunit 11                                                                              | Ndufa11               | 1 | 16,3 | 8,483291798 |
| <b>Q8BTV2</b>                         | Cleavage and polyadenylation<br>specificity factor subunit 7                                                                                  | Cpsf7                 | 1 | 2,5  | 8,48143619  |
| <b>Q8BPE4</b>                         | Transmembrane protein 177                                                                                                                     | Tmem177               | 1 | 3,2  | 8,420802382 |
| <b>Q8BKE6</b>                         | Cytochrome P450 20A1                                                                                                                          | Cyp20a1               | 1 | 3,9  | 8,384136172 |
| <b>A2AM29</b>                         | Protein AF-9                                                                                                                                  | Mllt3                 | 1 | 2,6  | 8,38383387  |
| <b>P03975</b>                         | IgE-binding protein                                                                                                                           | Iap                   | 1 | 2    | 8,380201292 |
| <b>Q9D855</b>                         | Cytochrome b-c1 complex subunit 7                                                                                                             | Uqcrb                 | 1 | 13,5 | 8,37716714  |
| <b>A6X919</b>                         | Probable C-mannosyltransferase<br>DPY19L1                                                                                                     | Dpy19l1               | 1 | 1,9  | 8,365403843 |
| <b>Q9DCR2</b>                         | AP-3 complex subunit sigma-1                                                                                                                  | Ap3s1                 | 1 | 7,8  | 8,365141344 |
| <b>P59108</b>                         | Copine-2                                                                                                                                      | Cpne2                 | 1 | 2,9  | 8,353455626 |
| <b>Q64674</b>                         | Spermidine synthase                                                                                                                           | Srm                   | 1 | 3,3  | 8,34638076  |
| <b>Q9CQ89</b>                         | Protein CutA                                                                                                                                  | Cuta                  | 1 | 7,9  | 8,345760055 |



|                           |                                                                                                     |                  |   |      |             |
|---------------------------|-----------------------------------------------------------------------------------------------------|------------------|---|------|-------------|
| <b>P47754</b>             | F-Actin-capping protein subunit alpha-2                                                             | Capza2           | 1 | 6,3  | 8,331767907 |
| <b>O08848</b>             | 60 kDa SS-A/Ro ribonucleoprotein                                                                    | Trove2           | 1 | 2    | 8,319717275 |
| <b>Q61699</b>             | Heat shock protein 105 kDa                                                                          | Hsph1            | 1 | 1,5  | 8,317367388 |
| <b>Q3UKJ7</b>             | WD40 repeat-containing protein SMU1;<br>WD40 repeat-containing protein SMU1, N-terminally processed | Smu1             | 1 | 2,5  | 8,305240966 |
| <b>Q9WTL7</b>             | Acyl-protein thioesterase 2                                                                         | Lypla2           | 1 | 7,8  | 8,302501844 |
| <b>Q9D1C9</b>             | Ribosomal RNA-processing protein 7 homolog A                                                        | Rrp7a            | 1 | 6,4  | 8,292505697 |
| <b>O70378</b>             | ER membrane protein complex subunit 8                                                               | Emc8             | 1 | 7,7  | 8,289926659 |
| <b>Q80XI3</b>             | Eukaryotic translation initiation factor 4 gamma 3                                                  | Eif4g3           | 1 | 0,8  | 8,288773813 |
| <b>Q62311</b>             | Transcription initiation factor TFIID subunit 6                                                     | Taf6             | 1 | 1,8  | 8,259790333 |
| <b>Q99KU0</b>             | Vacuole membrane protein 1                                                                          | Vmp1             | 1 | 7,4  | 8,233188242 |
| <b>P52503</b>             | NADH dehydrogenase [ubiquinone] iron-sulfur protein 6, mitochondrial                                | Ndufs6           | 1 | 8,6  | 8,220088066 |
| <b>F8VQH7</b>             |                                                                                                     | Dbx2             | 1 | 4    | 8,209014642 |
| <b>Q9R1P3</b>             | Proteasome subunit beta type-2                                                                      | Psmb2            | 1 | 5,5  | 8,202858456 |
| <b>P83870</b>             | PHD finger-like domain-containing protein 5A                                                        | Phf5a            | 1 | 11,8 | 8,198886991 |
| <b>Q9EQI8</b>             | 39S ribosomal protein L46, mitochondrial                                                            | Mrpl46           | 1 | 4,9  | 8,185420589 |
| <b>Q9R0U0</b>             | Serine/arginine-rich splicing factor 10                                                             | Srsf10           | 1 | 6,1  | 8,166263528 |
| <b>Q9JMB0</b>             | G kinase-anchoring protein 1                                                                        | Gkap1            | 1 | 3    | 8,150407357 |
| <b>Q8BRF7</b>             | Sec1 family domain-containing protein 1                                                             | Scfd1            | 1 | 3    | 8,148425737 |
| <b>Q9DC53</b>             | Copine-8                                                                                            | Cpne8            | 1 | 3,3  | 8,146594131 |
| <b>Q9JHR7</b>             | Insulin-degrading enzyme                                                                            | Ide              | 1 | 1,2  | 8,146594131 |
| <b>Q9CR20</b>             | Immediate early response 3-interacting protein 1                                                    | Ier3ip1          | 1 | 24,4 | 8,12902537  |
| <b>P62814</b>             | V-Type proton ATPase subunit B, brain isoform                                                       | Atp6v1b2         | 1 | 2,9  | 8,126601235 |
| <b>D3YUM8;<br/>Q9R1P1</b> | Proteasome subunit beta type;<br>Proteasome subunit beta type-3                                     | Gm4950;Ps<br>mb3 | 1 | 7,8  | 8,12531014  |
| <b>O70333</b>             | Cysteine-rich PDZ-binding protein                                                                   | Cript            | 1 | 16,8 | 8,121481714 |
| <b>Q8BXZ1</b>             | Protein disulfide-isomerase TMX3                                                                    | Tmx3             | 1 | 2,4  | 8,109360559 |

|                      |                                                               |              |   |      |             |
|----------------------|---------------------------------------------------------------|--------------|---|------|-------------|
| O35857               | Mitochondrial import inner membrane translocase subunit TIM44 | Timm44       | 1 | 3,1  | 8,081350281 |
| O88456               | Calpain small subunit 1                                       | Capns1       | 1 | 5,6  | 8,055716264 |
| A0A0A6YVU;<br>Q9JKV1 | Proteasomal ubiquitin receptor ADRM1                          | Gm9774;Adrm1 | 1 | 3,9  | 8,051807107 |
| Q9ER67               |                                                               | Maged2       | 1 | 2,1  | 8,049685216 |
| O35387               | HCLS1-associated protein X-1                                  | Hax1         | 1 | 5    | 8,042863176 |
| Q8K1C0               | Protein angel homolog 2                                       | Angel2       | 1 | 3,3  | 8,035238993 |
| Q8C156               | Condensin complex subunit 2                                   | Ncaph        | 1 | 1,4  | 8,035018995 |
| P32921               | Tryptophan-tRNA ligase, cytoplasmic; T1-TrpRS; T2-TrpRS       | Wars         | 1 | 3,3  | 8,024751838 |
| O55137               | Acyl-coenzyme A thioesterase 1                                | Acot1        | 1 | 4,3  | 7,998421189 |
| P97742               | Carnitine O-palmitoyltransferase 1, liver isoform             | Cpt1a        | 1 | 1,8  | 7,995936704 |
| Q8CES0               | N-Alpha-acetyltransferase 30                                  | Naa30        | 1 | 4,1  | 7,99004722  |
| Q8BFQ6               | Disrupted in renal carcinoma protein 2 homolog                | Dirc2        | 1 | 3,1  | 7,969300173 |
| B2RQG2               |                                                               | Phf3         | 1 | 0,6  | 7,95011843  |
| Q9D6J6               | NADH dehydrogenase [ubiquinone] flavoprotein 2, mitochondrial | Ndufv2       | 1 | 4    | 7,923862268 |
| Q8BMJ2               | Leucine--tRNA ligase, cytoplasmic                             | Lars         | 1 | 2,2  | 7,922138369 |
| Q9D1E8               | 1-Acyl-sn-glycerol-3-phosphate acyltransferase epsilon        | Agpat5       | 1 | 5,8  | 7,921543444 |
| Q9D115               | Zinc-finger protein 706                                       | Znf706       | 1 | 14,5 | 7,915819639 |
| Q8C1D8               | Protein IWS1 homolog                                          | Iws1         | 1 | 1,6  | 7,906890596 |
| P0C0A3               | Charged multivesicular body protein 6                         | Chmp6        | 1 | 6,5  | 7,899356923 |
| Q7TT37               | Elongator complex protein 1                                   | Ikbkap       | 1 | 0,9  | 7,883681905 |
| Q99J47               | Dehydrogenase/reductase SDR family member 7B                  | Dhrs7b       | 1 | 2,8  | 7,872951851 |
| Q9EQM6               | Microprocessor complex subunit DGCR8                          | Dgcr8        | 1 | 1,6  | 7,868822555 |
| Q8C0I1               | Alkyldihydroxyacetonephosphate synthase, peroxisomal          | Agps         | 1 | 3,1  | 7,855927425 |
| Q8R0F5               | RNA-binding motif protein, X-linked 2                         | RbmX2        | 1 | 4    | 7,852997588 |
| Q61979               | Neuronatin                                                    | Nnat         | 1 | 12,3 | 7,838699702 |
| Q99NH2               | Partitioning defective 3 homolog                              | Pard3        | 1 | 1,6  | 7,823239844 |
| Q5SSI6               | U3 small nucleolar RNA-associated protein 18 homolog          | Utp18        | 1 | 2,2  | 7,814294058 |

|               |                                                                                                                 |          |   |      |             |
|---------------|-----------------------------------------------------------------------------------------------------------------|----------|---|------|-------------|
| <b>Q61187</b> | Tumor susceptibility gene 101 protein                                                                           | Tsg101   | 1 | 3,1  | 7,80928581  |
| <b>Q9D8V7</b> | Signal peptidase complex catalytic subunit SEC11C                                                               | Sec11c   | 1 | 10,4 | 7,806195147 |
| <b>Q9Z0J0</b> | Epididymal secretory protein E1                                                                                 | Npc2     | 1 | 10,7 | 7,800835204 |
| <b>Q8BXJ9</b> | Transmembrane protein 62                                                                                        | Tmem62   | 1 | 3,1  | 7,781753122 |
| <b>Q99L43</b> | Phosphatidate cytidyltransferase 2                                                                              | Cds2     | 1 | 3,8  | 7,778011402 |
| <b>Q6ZPR5</b> | Sphingomyelin phosphodiesterase 4                                                                               | Smpd4    | 1 | 1,8  | 7,741871424 |
| <b>Q9D8U2</b> | Transmembrane protein 41A                                                                                       | Tmem41a  | 1 | 4,5  | 7,717882018 |
| <b>Q3UQ44</b> | Ras GTPase-activating-like protein IQGAP2                                                                       | Iqgap2   | 1 | 0,6  | 7,711701384 |
| <b>Q7TMF3</b> | NADH dehydrogenase [ubiquinone] 1 alpha subcomplex subunit 12                                                   | Ndufa12  | 1 | 8,3  | 7,699329526 |
| <b>Q99K43</b> | Protein regulator of cytokinesis 1                                                                              | Prc1     | 1 | 1,7  | 7,681660088 |
| <b>D3Z0K6</b> |                                                                                                                 | Rsbn11   | 1 | 1,8  | 7,648824922 |
| <b>Q9D0R2</b> | Threonine-tRNA ligase, cytoplasmic                                                                              | Tars     | 1 | 1,4  | 7,623735202 |
| <b>Q9Z2I8</b> | Succinyl-CoA ligase [GDP-forming] subunit beta, mitochondrial                                                   | Suclg2   | 1 | 5,8  | 7,617283788 |
| <b>P30416</b> | Peptidyl-prolyl cis-trans isomerase FKBP4;<br>Peptidyl-prolyl cis-trans isomerase FKBP4, N-terminally processed | Fkbp4    | 1 | 2    | 7,596711567 |
| <b>Q8K354</b> | Carbonyl reductase [NADPH] 3                                                                                    | Cbr3     | 1 | 4    | 7,576673293 |
| <b>A2AAY5</b> | SH3 and PX domain-containing protein 2B                                                                         | Sh3pxd2b | 1 | 2,1  | 7,574858391 |
| <b>Q9JM76</b> | Actin-related protein 2/3 complex subunit 3                                                                     | Arpc3    | 1 | 6,2  | 7,564606811 |
| <b>Q9EP72</b> | ER membrane protein complex subunit 7                                                                           | Emc7     | 1 | 10,4 | 7,525129251 |
| <b>P28571</b> | Sodium- and chloride-dependent glycine transporter 1                                                            | Slc6a9   | 1 | 1,4  | 7,489687429 |
| <b>Q8VC48</b> | Peroxisome assembly protein 12                                                                                  | Pex12    | 1 | 7    | 7,487277313 |
| <b>Q9JL26</b> | Formin-like protein 1                                                                                           | Fmn1     | 1 | 2,7  | 7,484540972 |
| <b>P70257</b> | Nuclear factor 1 X-type                                                                                         | Nfix     | 1 | 10   | 7,481718719 |
| <b>Q8BZQ7</b> | Anaphase-promoting complex subunit 2                                                                            | Anapc2   | 1 | 1,1  | 7,463033855 |
| <b>Q505F5</b> | Leucine-rich repeat-containing protein 47                                                                       | Lrrc47   | 1 | 3,1  | 7,462297766 |
| <b>Q6ZQ73</b> | Cullin-associated NEDD8-dissociated protein 2                                                                   | Cand2    | 1 | 1,9  | 7,444517993 |
| <b>B9EJ86</b> | Oxysterol-binding protein                                                                                       | Osbpl8   | 1 | 1,2  | 7,433543714 |

|                           |                                                                                                 |                |   |      |             |
|---------------------------|-------------------------------------------------------------------------------------------------|----------------|---|------|-------------|
| <b>Q3U186</b>             | Probable arginine-tRNA ligase, mitochondrial                                                    | Rars2          | 1 | 2,1  | 7,406077422 |
| <b>Q9JKK7</b>             | Tropomodulin-2                                                                                  | Tmod2          | 1 | 4    | 7,378771701 |
| <b>Q9D8B3</b>             | Charged multivesicular body protein 4b                                                          | Chmp4b         | 1 | 6,2  | 7,369902646 |
| <b>P58854</b>             | Gamma-tubulin complex component 3                                                               | Tubgcp3        | 1 | 1,5  | 7,34029521  |
| <b>Q8K0H5</b>             | Transcription initiation factor TFIID subunit 10                                                | Taf10          | 1 | 11,5 | 7,296182058 |
| <b>Q9JME5</b>             | AP-3 complex subunit beta-2                                                                     | Ap3b2          | 1 | 3,5  | 7,270435501 |
| <b>Q01405</b>             | Protein transport protein Sec23A                                                                | Sec23a         | 1 | 1,7  | 7,264911693 |
| <b>Q80VE5</b>             |                                                                                                 | Tbc1d22b       | 1 | 2,6  | 7,24431626  |
| <b>Q8R0G9</b>             | Nuclear pore complex protein Nup133                                                             | Nup133         | 1 | 1,8  | 7,204179852 |
| <b>Q99LS0</b>             | Augurin                                                                                         | Ecrg4          | 1 | 7,4  | 7,188836073 |
| <b>Q8BMQ2</b>             | General transcription factor 3C polypeptide 4                                                   | Gtf3c4         | 1 | 3,5  | 7,184181096 |
| <b>Q8BUV8</b>             | Protein GPR107                                                                                  | Gpr107         | 1 | 2    | 7,14689956  |
| <b>P80205</b>             | Homeobox protein OTX1                                                                           | Otx1           | 1 | 3,4  | 7,136068312 |
| <b>Q99JH8</b>             | ER lumen protein-retaining receptor 1                                                           | Kdelr1         | 1 | 9    | 7,096240766 |
| <b>P97858</b>             | Solute carrier family 35 member B1                                                              | Slc35b1        | 1 | 3,1  | 7,085339669 |
| <b>Q9QYC0</b>             | Alpha-adducin                                                                                   | Add1           | 1 | 2,4  | 7,085020924 |
| <b>Q99KI3</b>             | ER membrane protein complex subunit 3                                                           | Emc3           | 1 | 6,5  | 7,06371864  |
| <b>Q9QXK3</b>             | Coatomer subunit gamma-2                                                                        | Copg2          | 1 | 3,3  | 7,062639828 |
| <b>Q9JM99</b>             | Proteoglycan 4;<br>Proteoglycan 4 C-terminal part                                               | Prg4           | 1 | 1,6  | 7,001464494 |
| <b>Q9Z0E0</b>             | Neurochondrin                                                                                   | Ncdn           | 1 | 2,1  | 6,988457473 |
| <b>Q02111</b>             | Protein kinase C theta type                                                                     | Prkcq          | 1 | 1,1  | 6,984475425 |
| <b>Q3UU43</b>             |                                                                                                 | Chpf2          | 1 | 2,5  | 6,970738639 |
| <b>P36916</b>             | Guanine nucleotide-binding protein-like 1                                                       | Gnl1           | 1 | 2    | 6,955708021 |
| <b>Q80UU9</b>             | Membrane-associated progesterone receptor component 2                                           | Pgrmc2         | 1 | 11,5 | 6,947432389 |
| <b>Q7M6Y3;<br/>Q61548</b> | Phosphatidylinositol-binding clathrin assembly protein;<br>Clathrin coat assembly protein AP180 | Picalm;Snap 91 | 1 | 1,8  | 6,928133408 |
| <b>Q99J27</b>             | Acetyl-coenzyme A transporter 1                                                                 | Slc33a1        | 1 | 2    | 6,895302621 |
| <b>Q6PD26</b>             | GPI transamidase component PIG-S                                                                | Pigs           | 1 | 3,8  | 6,87282876  |

|                                                   |                                                                                                                              |                          |     |      |             |
|---------------------------------------------------|------------------------------------------------------------------------------------------------------------------------------|--------------------------|-----|------|-------------|
| <b>Q8BH73</b>                                     | Glutaminyl-peptide cyclotransferase-like protein                                                                             | Qpctl                    | 1   | 3,7  | 6,869254527 |
| <b>Q61001</b>                                     | Laminin subunit alpha-5                                                                                                      | Lama5                    | 1   | 0,3  | 6,837312556 |
| <b>Q8BH64</b>                                     | EH domain-containing protein 2                                                                                               | Ehd2                     | 1   | 4,6  | 6,822220272 |
| <b>Q8CI94</b>                                     | Glycogen phosphorylase, brain form                                                                                           | Pygb                     | 1   | 1,4  | 6,761817143 |
| <b>Q8BQM4</b>                                     | HEAT repeat-containing protein 3                                                                                             | Heatr3                   | 1   | 1,6  | 6,708325207 |
| <b>P28184</b>                                     | Metallothionein-3                                                                                                            | Mt3                      | 1   | 17,6 | 6,656782364 |
| <b>P17710</b>                                     | Hexokinase-1                                                                                                                 | Hk1                      | 1   | 1,5  | 6,601221086 |
| <b>P70195</b>                                     | Proteasome subunit beta type-7                                                                                               | Psmb7                    | 1   | 6,9  | 6,569293607 |
| <b>Q924C1</b>                                     | Exportin-5                                                                                                                   | Xpo5                     | 1   | 0,8  | 6,491211756 |
| <b>Q9D0F9</b>                                     | Phosphoglucomutase-1                                                                                                         | Pgm1                     | 1   | 3,2  | 6,409577626 |
| <b>Q8BIX3</b>                                     | ARL14 effector protein                                                                                                       | Arl14ep                  | 1   | 5,8  | 6,235363277 |
| <b>P58742</b>                                     | Aladin                                                                                                                       | Aaas                     | 1   | 2,9  | 6,208029464 |
| <b>Q80TL7</b>                                     | Protein MON2 homolog                                                                                                         | Mon2                     | 1   | 0,6  | 5,936567275 |
| <b>Q8BS95</b>                                     | Golgi pH regulator                                                                                                           | Gpr89a                   | 1   | 5,9  | 5,694768783 |
| <b>Q8JZM7</b>                                     | Parafibromin                                                                                                                 | Cdc73                    | 1   | 3,8  | 5,658240051 |
| <b>Q9CQN6</b>                                     | Transmembrane protein 14C                                                                                                    | Tmem14c                  | 1   | 25,4 | 5,585413272 |
| <b>Q9JI33</b>                                     | Netrin-4                                                                                                                     | Ntn4                     | 1   | 3    | 4,032139453 |
| <b>P0DN91;<br/>P0DN90;<br/>P0DN89</b>             |                                                                                                                              |                          | 1   | 8,9  | 2,624162979 |
| <b>P18828</b>                                     | Syndecan-1                                                                                                                   | Sdc1                     | 1   | 6,4  | 1,877080242 |
| <b>P62748</b>                                     | Hippocalcin-like protein 1                                                                                                   | Hpcal1                   | 1   | 14,5 | 1,869411629 |
| <b>Q9CRC0</b>                                     | Vitamin K epoxide reductase complex subunit 1                                                                                | Vkorc1                   | 1   | 8,1  | 1,632703995 |
| <b>Q9CQC9;<br/>P36536</b>                         | GTP-binding protein SAR1b;GTP-binding protein SAR1a                                                                          | Sar1b;Sar1a              | 1   | 5,6  | 1,514517971 |
| <b>Q8BHL7</b>                                     | CDC42 small effector protein 1                                                                                               | Cdc42se1                 | 1   | 15   | 1,297153202 |
| <b>A0A1Y7VKT9;<br/>Q9EPV8</b>                     | Ubiquitin-like protein 5                                                                                                     | Ubl5                     | 1   | 12,3 | 1,160664742 |
| <b>Q6ZWY3</b>                                     | 40S Ribosomal protein S27-like                                                                                               | Rps27l                   | 1   | 23,8 | 1,144222615 |
| <b>P68134;<br/>P68033;<br/>P63268;<br/>P62737</b> | Actin, alpha skeletal muscle; Actin, alpha cardiac muscle 1; Actin, gamma-enteric smooth muscle; Actin, aortic smooth muscle | Acta1;Actc1; Actg2;Acta2 | 1   | 33,2 | 1,10318585  |
| <b>P35762</b>                                     | CD81 antigen                                                                                                                 | Cd81                     | 1   | 9,7  | 1,0330895   |
| <b>Q3UV17</b>                                     | Keratin, type II cytoskeletal 2 oral                                                                                         | Krt76                    | 1   | 12,1 | 1,013131994 |
| <b>F6ZDS4</b>                                     | Nucleoprotein TPR                                                                                                            | Tpr                      | 248 | 69,6 | 10,55681407 |
| <b>Q62167;P16381</b>                              | ATP-dependent RNA helicase DDX3X; Putative ATP-dependent RNA helicase PI10                                                   | Ddx3x;D1Pa s1            | 13  | 60,1 | 1,010507342 |

|                               |                                                                      |         |    |      |             |
|-------------------------------|----------------------------------------------------------------------|---------|----|------|-------------|
| <b>O35691</b>                 | Pinin                                                                | Pnn     | 21 | 28,6 | 2,407936207 |
| <b>P07356</b>                 | Annexin A2                                                           | Anxa2   | 17 | 46,3 | 1,007189389 |
| <b>P63276</b>                 | 40S Ribosomal protein S17                                            | Rps17   | 16 | 74,8 | 1,045357657 |
| <b>Q9WTS2</b>                 | Alpha-(1,6)-fucosyltransferase                                       | Fut8    | 11 | 24,2 | 1,165357074 |
| <b>Q920E5;<br/>A0A0G2JEA5</b> | Farnesyl pyrophosphate synthase                                      | Fdps    | 10 | 33,7 | 1,492091583 |
| <b>P62301</b>                 | 40S Ribosomal protein S13                                            | Rps13   | 10 | 52,3 | 1,014573556 |
| <b>P61514</b>                 | 60S Ribosomal protein L37a                                           | Rpl37a  | 7  | 59,8 | 1,615189326 |
| <b>Q99K85</b>                 | Phosphoserine aminotransferase                                       | Psat1   | 6  | 16,8 | 12,80598564 |
| <b>Q9CR67</b>                 | Transmembrane protein 33                                             | Tmem33  | 6  | 24,7 | 2,915590831 |
| <b>Q91V41</b>                 | Ras-related protein Rab-14                                           | Rab14   | 6  | 30,7 | 2,355994031 |
| <b>Q6ZWV7</b>                 | 60S ribosomal protein L35                                            | Rpl35   | 6  | 39   | 1,114525816 |
| <b>Q9CZB0</b>                 | Succinate dehydrogenase<br>cytochrome b560 subunit,<br>mitochondrial | Sdhc    | 5  | 29,6 | 11,64849241 |
| <b>P70333</b>                 | Heterogeneous nuclear<br>ribonucleoprotein H2                        | Hnrnp2  | 5  | 37,2 | 1,418037426 |
| <b>Q8JZU2</b>                 | Tricarboxylate transport protein,<br>mitochondrial                   | Slc25a1 | 5  | 17   | 1,004529846 |
| <b>Q61881</b>                 | DNA replication licensing factor<br>MCM7                             | Mcm7    | 4  | 8,1  | 10,12760749 |
| <b>Q91V04</b>                 | Translocating chain-associated<br>membrane protein 1                 | Tram1   | 3  | 10,2 | 10,60186362 |
| <b>P51807</b>                 | Dynein light chain Tctex-type 1                                      | Dynlt1  | 3  | 38,9 | 9,905808168 |
| <b>Q78IK2</b>                 | Up-regulated during skeletal muscle<br>growth protein 5              | Usmg5   | 2  | 27,6 | 9,655423389 |
| <b>P52875</b>                 | Transmembrane protein 165                                            | Tmem165 | 2  | 8,7  | 8,801805344 |
| <b>Q8BY71</b>                 | Histone acetyltransferase type B<br>catalytic subunit                | Hat1    | 2  | 6    | 8,724002168 |
| <b>Q62095;Q6149<br/>6</b>     | ATP-dependent RNA helicase<br>DDX3Y                                  | Ddx3y   | 2  | 35,9 | 1,356013408 |
| <b>Q9CQX2</b>                 | Cytochrome b5 type B                                                 | Cyb5b   | 1  | 23,3 | 10,77313921 |
| <b>Q9R0P4</b>                 | Small acidic protein                                                 | Smap    | 1  | 12,7 | 10,16628864 |
| <b>Q9R0Q9</b>                 | Mannose-P-dolichol utilization<br>defect 1 protein                   | Mpdu1   | 1  | 3,6  | 10,11517373 |
| <b>Q78XF5</b>                 | Oligosaccharyltransferase complex<br>subunit OSTC                    | Ostc    | 1  | 8,1  | 9,336394978 |
| <b>Q99JX4</b>                 | Eukaryotic translation initiation<br>factor 3 subunit M              | Eif3m   | 1  | 5,9  | 8,605775805 |
| <b>Q7TN29</b>                 | Stromal membrane-associated<br>protein 2                             | Smap2   | 1  | 3    | 8,33998358  |

|                      |                                                                |         |   |      |             |
|----------------------|----------------------------------------------------------------|---------|---|------|-------------|
| <b>Q3TDN2</b>        | FAS-associated factor 2                                        | Faf2    | 1 | 4    | 8,298429211 |
| <b>P62821</b>        | Ras-related protein Rab-1A                                     | Rab1A   | 1 | 13,7 | 6,99004722  |
| <b>Q62446</b>        | Peptidyl-prolyl cis-trans isomerase FKBP3                      | Fkbp3   | 1 | 6,7  | 1,331696045 |
| <b>Q9CRA4</b>        | Methylsterol monooxygenase 1                                   | Msmo1   | 1 | 3,8  | 1,012938432 |
| <b>Q91V41</b>        | Ras-related protein Rab-14                                     | Rab14   | 6 | 30,7 | 2,355994031 |
| <b>Q6ZWV7</b>        | 60S Ribosomal protein L35                                      | Rpl35   | 6 | 39   | 1,114525816 |
| <b>Q9CZB0</b>        | Succinate dehydrogenase cytochrome b560 subunit, mitochondrial | Sdhc    | 5 | 29,6 | 11,64849241 |
| <b>P70333</b>        | Heterogeneous nuclear ribonucleoprotein H2                     | Hnrnp2  | 5 | 37,2 | 1,418037426 |
| <b>Q8JZU2</b>        | Tricarboxylate transport protein, mitochondrial                | Slc25a1 | 5 | 17   | 1,004529846 |
| <b>Q61881</b>        | DNA replication licensing factor MCM7                          | Mcm7    | 4 | 8,1  | 10,12760749 |
| <b>Q91V04</b>        | Translocating chain-associated membrane protein 1              | Tram1   | 3 | 10,2 | 10,60186362 |
| <b>P51807</b>        | Dynein light chain Tctex-type 1                                | Dynlt1  | 3 | 38,9 | 9,905808168 |
| <b>Q78IK2</b>        | Up-regulated during skeletal muscle growth protein 5           | Usmg5   | 2 | 27,6 | 9,655423389 |
| <b>P52875</b>        | Transmembrane protein 165                                      | Tmem165 | 2 | 8,7  | 8,801805344 |
| <b>Q8BY71</b>        | Histone acetyltransferase type B catalytic subunit             | Hat1    | 2 | 6    | 8,724002168 |
| <b>Q62095;Q61496</b> | ATP-dependent RNA helicase DDX3Y                               | Ddx3y   | 2 | 35,9 | 1,356013408 |
| <b>Q9CQX2</b>        | Cytochrome b5 type B                                           | Cyb5b   | 1 | 23,3 | 10,77313921 |
| <b>Q9R0P4</b>        | Small acidic protein                                           | Smap    | 1 | 12,7 | 10,16628864 |
| <b>Q9R0Q9</b>        | Mannose-P-dolichol utilization defect 1 protein                | Mpdu1   | 1 | 3,6  | 10,11517373 |
| <b>Q78XF5</b>        | Oligosaccharyltransferase complex subunit OSTC                 | Ostc    | 1 | 8,1  | 9,336394978 |
| <b>Q99JX4</b>        | Eukaryotic translation initiation factor 3 subunit M           | Eif3m   | 1 | 5,9  | 8,605775805 |
| <b>Q7TN29</b>        | Stromal membrane-associated protein 2                          | Smap2   | 1 | 3    | 8,33998358  |
| <b>Q3TDN2</b>        | FAS-associated factor 2                                        | Faf2    | 1 | 4    | 8,298429211 |
| <b>P62821</b>        | Ras-related protein Rab-1A                                     | Rab1A   | 1 | 13,7 | 6,99004722  |
| <b>Q62446</b>        | Peptidyl-prolyl cis-trans isomerase FKBP3                      | Fkbp3   | 1 | 6,7  | 1,331696045 |
| <b>Q9CRA4</b>        | Methylsterol monooxygenase 1                                   | Msmo1   | 1 | 3,8  | 1,012938432 |

*S2.2 Supplemental Table S2: P-Tpr interacting proteins of WT adult NSPCs.*

**Supplemental Table S2:** Table showing 119 P-Tpr interacting proteins of WT adult NSPCs with a Log2 FC > 1.0.

| Protein IDs                                                                         | Protein names                                                                                | Gene names    | Unique peptides | Sequence coverage [%] | Log2 fold change (FC) of LFQ intensity (a-TPR/IgG) |
|-------------------------------------------------------------------------------------|----------------------------------------------------------------------------------------------|---------------|-----------------|-----------------------|----------------------------------------------------|
| A0A140T8N2; P01642                                                                  | Ig Kappa chain V-V region L7                                                                 | Gm10881       | 1               | 10,4                  | 4,498780686                                        |
| D3YZP9                                                                              | Coiled-coil domain-containing protein 6                                                      | Ccdc6         | 4               | 12,6                  | 1,295773258                                        |
| O09167                                                                              | 60S Ribosomal protein L21                                                                    | Rpl21         | 3               | 20,6                  | 1,324105654                                        |
| O35963                                                                              | Ras-related protein Rab-33B                                                                  | Rab33b        | 2               | 7,9                   | 2,211431665                                        |
| O55135                                                                              | Eukaryotic translation initiation factor 6                                                   | Eif6          | 6               | 33,1                  | 1,089663906                                        |
| O70589                                                                              | Peripheral plasma membrane protein CASK                                                      | Cask          | 2               | 2,1                   | 1,361306321                                        |
| P05213;P68368;A0A2R8VHF3                                                            | Tubulin alpha-1B chain; Tubulin alpha-4A chain                                               | Tuba1b;Tuba4a | 2               | 80,3                  | 1,499615767                                        |
| P10126;P62631                                                                       | Elongation factor 1-alpha 1                                                                  | Eef1a1        | 29              | 67,5                  | 1,224408258                                        |
| P11440;Q14AX6;Q69ZA1;Q04735;Q8K0D0;Q04899;O35495;P97377;Q99J95;Q3V3A1;Q80YP0;Q64261 | Cyclin-dependent kinase 1                                                                    | Cdk1          | 4               | 16,8                  | 1,137745124                                        |
| P13707                                                                              | Glycerol-3-phosphate dehydrogenase [NAD(+)], cytoplasmic                                     | Gpd1          | 7               | 22,6                  | 1,363549426                                        |
| P15919                                                                              | V(D)J Recombination-activating protein 1; Endonuclease RAG1;E3 ubiquitin-protein ligase RAG1 | Rag1          | 2               | 2,6                   | 4,353341778                                        |
| P16858; A0A1D5RLD; S4R1W1;                                                          | Glyceraldehyde-3-phosphate dehydrogenase                                                     | Gapdh; Gm3839 | 20              | 71,8                  | 1,11882841                                         |



|                                                   |                                                                                                                                       |                         |    |      |             |
|---------------------------------------------------|---------------------------------------------------------------------------------------------------------------------------------------|-------------------------|----|------|-------------|
| <b>Q64467;<br/>V9GX06;<br/>V9GXA7</b>             |                                                                                                                                       |                         |    |      |             |
| <b>P17225;<br/>B2RU80</b>                         | Polypyrimidine tract-binding protein 1                                                                                                | Ptbp1                   | 10 | 40   | 1,010126516 |
| <b>P28740;<br/>Q8C0N1</b>                         | Kinesin-like protein KIF2A                                                                                                            | Kif2a                   | 11 | 14,6 | 1,735166157 |
| <b>P30681</b>                                     | High mobility group protein B2                                                                                                        | Hmgb2                   | 11 | 49,5 | 1,156788685 |
| <b>P41731</b>                                     | CD63 antigen                                                                                                                          | Cd63                    | 1  | 4,6  | 4,721943701 |
| <b>P48432;<br/>P53783;<br/>Q811W0;<br/>P53784</b> | Transcription factor SOX-2;<br>Transcription factor SOX-1;<br>Transcription factor SOX-21;<br>Transcription factor SOX-3              | Sox2;Sox1;Sox21;Sox3    | 2  | 8,2  | 2,272434135 |
| <b>P56135</b>                                     | ATP synthase subunit f, mitochondrial                                                                                                 | Atp5j2                  | 2  | 26,1 | 1,413832201 |
| <b>P56564;<br/>O35544</b>                         | Excitatory amino acid transporter 1                                                                                                   | Slc1a3                  | 5  | 15,7 | 1,062490733 |
| <b>P61164</b>                                     | Alpha-centractin                                                                                                                      | Actr1a                  | 3  | 27,7 | 1,599889888 |
| <b>P62305</b>                                     | Small nuclear ribonucleoprotein E                                                                                                     | Snrpe                   | 2  | 25   | 1,351564329 |
| <b>P62315</b>                                     | Small nuclear ribonucleoprotein Sm D1                                                                                                 | Snrpd1                  | 5  | 54,6 | 1,892518322 |
| <b>P62320</b>                                     | Small nuclear ribonucleoprotein Sm D3                                                                                                 | Snrpd3                  | 3  | 31,7 | 1,153755406 |
| <b>P62892</b>                                     | 60S Ribosomal protein L39                                                                                                             | Rpl39                   | 1  | 19,6 | 1,008486093 |
| <b>P63028</b>                                     | Translationally-controlled tumor protein                                                                                              | Tpt1                    | 5  | 34,3 | 1,541641712 |
| <b>P63082</b>                                     | V-Type proton ATPase 16 kDa proteolipid subunit                                                                                       | Atp6v0c                 | 2  | 31,6 | 1,314302637 |
| <b>P63325;<br/>A0A3B2W864</b>                     | 40S Ribosomal protein S10                                                                                                             | Rps10                   | 5  | 33,3 | 1,03745558  |
| <b>P68134;<br/>P68033;<br/>P62737; P63268</b>     | Actin, alpha skeletal muscle;<br>Actin, alpha cardiac muscle 1;<br>Actin, aortic smooth muscle;<br>Actin, gamma-enteric smooth muscle | Acta1;Actc1;Acta2;Actg2 | 1  | 34,7 | 1,282806725 |
| <b>P68369;<br/>P05214</b>                         | Tubulin alpha-1A chain;<br>Tubulin alpha-3 chain                                                                                      | Tuba1a;<br>Tuba3a       | 1  | 80,3 | 3,370136521 |
| <b>Q01730</b>                                     | Ras suppressor protein 1                                                                                                              | Rsu1                    | 5  | 24,2 | 2,617973124 |
| <b>Q3TW96;Q91YN5</b>                              | UDP-N-acetylhexosamine pyrophosphorylase-like protein 1                                                                               | Uap1l1                  | 2  | 5,9  | 1,592914243 |
| <b>Q3TWW8</b>                                     | Serine/arginine-rich splicing factor 6                                                                                                | Srsf6                   | 4  | 16,8 | 1,372126882 |
| <b>Q3TZ89</b>                                     | Protein transport protein Sec31B                                                                                                      | Sec31b                  | 2  | 1,5  | 1,137133582 |

|                                                   |                                                                                   |                      |    |      |             |
|---------------------------------------------------|-----------------------------------------------------------------------------------|----------------------|----|------|-------------|
| <b>Q3UGR5</b>                                     | Haloacid dehalogenase-like hydrolase domain-containing protein 2                  | Hdhd2                | 3  | 16,2 | 1,738474817 |
| <b>Q3UX10</b>                                     | Tubulin alpha chain-like 3                                                        | Tubal3               | 1  | 8,3  | 1,442220386 |
| <b>Q5SUF2</b>                                     | Luc7-like protein 3                                                               | Luc7l3               | 3  | 8,8  | 1,391529121 |
| <b>Q5SUR0</b>                                     | Phosphoribosylformylglycinamidine synthase                                        | Pfas                 | 8  | 8,8  | 1,499241778 |
| <b>Q60749;<br/>Q9WU01</b>                         | KH domain-containing, RNA-binding, signal transduction-associated protein 1       | Khdrbs1              | 7  | 25,1 | 1,381593087 |
| <b>Q61205</b>                                     | Platelet-activating factor acetylhydrolase IB subunit gamma                       | Pafah1b3             | 2  | 7,3  | 1,450606584 |
| <b>Q61206</b>                                     | Platelet-activating factor acetylhydrolase IB subunit beta                        | Pafah1b2             | 1  | 3,9  | 2,211123412 |
| <b>Q61249;<br/>Q9QZ29</b>                         | Immunoglobulin-binding protein 1                                                  | Igbp1                | 3  | 13,2 | 1,116800011 |
| <b>Q62186</b>                                     | Translocon-associated protein subunit delta                                       | Ssr4                 | 4  | 30,8 | 1,899341285 |
| <b>Q64152</b>                                     | Transcription factor BTF3                                                         | Btf3                 | 3  | 27   | 1,260510415 |
| <b>Q6P1F6;<br/>Q8BG02;Q6Z<br/>WR4;<br/>Q925E7</b> | Serine/threonine-protein phosphatase 2A 55-kDa regulatory subunit B alpha isoform | Ppp2r2a              | 6  | 15,4 | 1,541125709 |
| <b>Q810B6</b>                                     | Rabankyrin-5                                                                      | Ankfy1               | 1  | 1,3  | 1,047688017 |
| <b>Q8BHC4</b>                                     | Dephospho-CoA kinase domain-containing protein                                    | Dcakd                | 6  | 27,7 | 1,228048373 |
| <b>Q8BHI7</b>                                     | Elongation of very long chain fatty acids protein 5                               | Elov15               | 1  | 3    | 1,368859514 |
| <b>Q8BHT6</b>                                     | Beta-1,3-Glucosyltransferase                                                      | B3galtl              | 2  | 4,5  | 1,522895592 |
| <b>Q8BML9</b>                                     |                                                                                   | Qars                 | 2  | 3,1  | 1,409242314 |
| <b>Q8BRN9</b>                                     | Coiled-coil and C2 domain-containing protein 1B                                   | Cc2d1b               | 28 | 48,5 | 8,625971144 |
| <b>Q8BUR4</b>                                     | Dedicator of cytokinesis protein 1                                                | Dock1                | 5  | 3,2  | 1,273957919 |
| <b>Q8BVU5</b>                                     | ADP-ribose pyrophosphatase, mitochondrial                                         | Nudt9                | 12 | 39,4 | 5,148520409 |
| <b>Q8B XK8;Q8V<br/>HH5</b>                        | Arf-GAP with GTPase, ANK repeat and PH domain-containing protein 1                | Agap1                | 10 | 16,7 | 2,401060435 |
| <b>Q8C2E7</b>                                     | WASH complex subunit strumpellin                                                  | Kiaa0196             | 2  | 2    | 1,146504113 |
| <b>Q8CGP5;<br/>Q8R1M2;<br/>Q8CGP7;</b>            | Histone H2A type 1-F;<br>Histone H2A.J;<br>Histone H2A type 1-K;                  | Hist1h2af;<br>H2afj; | 1  | 35,4 | 1,928399489 |

|                                                                                                                                 |                                                                       |                                                    |    |      |             |
|---------------------------------------------------------------------------------------------------------------------------------|-----------------------------------------------------------------------|----------------------------------------------------|----|------|-------------|
| Q8BFU2;<br>Q8CGP4;<br>Q8CGP6;<br>C0HKE9;<br>C0HKE8;<br>C0HKE7;<br>C0HKE6;<br>C0HKE5;<br>C0HKE4;<br>C0HKE3;<br>C0HKE2;<br>C0HKE1 | Histone H2A type 3;<br>Histone H2A;<br>Histone H2A type 1-H           | Hist1h2ak;<br>Hist3h2a;<br>Hist1h2aa;<br>Hist1h2ah |    |      |             |
| Q8K019                                                                                                                          | Bcl-2-Associated transcription factor 1                               | Bclaf1                                             | 9  | 14,9 | 1,506306238 |
| Q8R010                                                                                                                          | Aminoacyl tRNA synthase complex-interacting multifunctional protein 2 | Aimp2                                              | 3  | 19,4 | 1,742938995 |
| Q8VDS4                                                                                                                          | Regulation of nuclear pre-mRNA domain-containing protein 1A           | Rprd1a                                             | 1  | 5,8  | 1,247481055 |
| Q8VGE3;<br>Q60893                                                                                                               | Olfactory receptor;<br>Olfactory receptor 151                         | Olfr160;<br>Olfr151                                | 2  | 2,9  | 2,642190614 |
| Q8VH51                                                                                                                          | RNA-binding protein 39                                                | Rbm39                                              | 4  | 9,2  | 1,238317085 |
| Q91W69                                                                                                                          | Epsin-3                                                               | Epn3                                               | 1  | 2,7  | 2,039262505 |
| Q91W90                                                                                                                          | Thioredoxin domain-containing protein 5                               | Txndc5                                             | 6  | 20,1 | 1,146315575 |
| Q91X97                                                                                                                          | Neurocalcin-delta                                                     | Ncald                                              | 3  | 33,7 | 3,177778292 |
| Q91Z69                                                                                                                          | SLIT-ROBO Rho GTPase-activating protein 1                             | Srgap1                                             | 1  | 2,4  | 1,309674627 |
| Q921F4                                                                                                                          | Heterogeneous nuclear ribonucleoprotein L-like                        | Hnrnp1l                                            | 11 | 23,2 | 1,043987411 |
| Q922P9                                                                                                                          | Putative oxidoreductase GLYR1                                         | Glyr1                                              | 4  | 9,3  | 1,405402295 |
| Q925I1                                                                                                                          | ATPase family AAA domain-containing protein 3                         | Atad3                                              | 4  | 6,3  | 2,243947744 |
| Q925N0                                                                                                                          | Sideroflexin-5                                                        | Sfxn5                                              | 4  | 13,5 | 1,736791155 |
| Q99KN9                                                                                                                          | Clathrin interactor 1                                                 | Clint1                                             | 20 | 28,4 | 3,235505151 |
| Q99M28                                                                                                                          | RNA-binding protein with serine-rich domain 1                         | Rnps1                                              | 2  | 7,5  | 1,557158456 |
| Q9CQT1                                                                                                                          | Methylthioribose-1-phosphate isomerase                                | Mri1                                               | 3  | 9,2  | 1,489087194 |
| Q9CWF2                                                                                                                          | Tubulin beta-2B chain                                                 | Tubb2b                                             | 2  | 79,6 | 2,207587926 |
| Q9CX86                                                                                                                          | Heterogeneous nuclear ribonucleoprotein A0                            | Hnrnpa0                                            | 6  | 26,2 | 1,138289427 |

|                                                                                                                                                                                                                           |                                                                                                                                                                                                                                                                                                                                                                                                                                                                                                                                                    |                                                                                                                         |    |      |             |
|---------------------------------------------------------------------------------------------------------------------------------------------------------------------------------------------------------------------------|----------------------------------------------------------------------------------------------------------------------------------------------------------------------------------------------------------------------------------------------------------------------------------------------------------------------------------------------------------------------------------------------------------------------------------------------------------------------------------------------------------------------------------------------------|-------------------------------------------------------------------------------------------------------------------------|----|------|-------------|
| <b>Q9CY50</b>                                                                                                                                                                                                             | Translocon-associated protein subunit alpha                                                                                                                                                                                                                                                                                                                                                                                                                                                                                                        | Ssr1                                                                                                                    | 2  | 8    | 1,16509753  |
| <b>Q9CY62</b>                                                                                                                                                                                                             | E3 ubiquitin-protein ligase RNF181                                                                                                                                                                                                                                                                                                                                                                                                                                                                                                                 | Rnf181                                                                                                                  | 1  | 4,8  | 1,706513368 |
| <b>Q9D024</b>                                                                                                                                                                                                             | Coiled-coil domain-containing protein 47                                                                                                                                                                                                                                                                                                                                                                                                                                                                                                           | Ccdc47                                                                                                                  | 8  | 20,3 | 1,295595125 |
| <b>Q9D3B1</b>                                                                                                                                                                                                             | Very-long-chain (3R)-3-hydroxyacyl-CoA dehydratase 2                                                                                                                                                                                                                                                                                                                                                                                                                                                                                               | Hacd2                                                                                                                   | 1  | 4,7  | 1,266659235 |
| <b>Q9D883; Q8BGJ9</b>                                                                                                                                                                                                     | Splicing factor U2AF 35-kDa subunit                                                                                                                                                                                                                                                                                                                                                                                                                                                                                                                | U2af1                                                                                                                   | 6  | 33,5 | 2,766214711 |
| <b>Q9DBS1</b>                                                                                                                                                                                                             | Transmembrane protein 43                                                                                                                                                                                                                                                                                                                                                                                                                                                                                                                           | Tmem43                                                                                                                  | 2  | 6    | 3,031366943 |
| <b>Q9EP53</b>                                                                                                                                                                                                             | Hamartin                                                                                                                                                                                                                                                                                                                                                                                                                                                                                                                                           | Tsc1                                                                                                                    | 2  | 2    | 2,360121666 |
| <b>Q9JJI8</b>                                                                                                                                                                                                             | 60S ribosomal protein L38                                                                                                                                                                                                                                                                                                                                                                                                                                                                                                                          | Rpl38                                                                                                                   | 5  | 50   | 1,16335522  |
| <b>Q9QZM0</b>                                                                                                                                                                                                             | Ubiquilin-2                                                                                                                                                                                                                                                                                                                                                                                                                                                                                                                                        | Ubqln2                                                                                                                  | 3  | 9,2  | 1,23705456  |
| <b>Q9Z0U1;Q9QXY1</b>                                                                                                                                                                                                      | Tight junction protein ZO-2                                                                                                                                                                                                                                                                                                                                                                                                                                                                                                                        | Tjp2                                                                                                                    | 31 | 29,3 | 2,541364885 |
| <b>Q9Z1N5</b>                                                                                                                                                                                                             | Spliceosome RNA helicase Ddx39b                                                                                                                                                                                                                                                                                                                                                                                                                                                                                                                    | Ddx39b                                                                                                                  | 4  | 39,7 | 1,11493492  |
| <b>Q9Z2X1</b>                                                                                                                                                                                                             | Heterogeneous nuclear ribonucleoprotein F; Heterogeneous nuclear ribonucleoprotein F, N-terminally processed                                                                                                                                                                                                                                                                                                                                                                                                                                       | Hnrnpf                                                                                                                  | 11 | 45,3 | 2,081889252 |
| <b>F6ZDS4</b>                                                                                                                                                                                                             | Nucleoprotein TPR                                                                                                                                                                                                                                                                                                                                                                                                                                                                                                                                  | Tpr                                                                                                                     | 81 | 38,6 | 3,68707732  |
| <b>O35691</b>                                                                                                                                                                                                             | Pinin                                                                                                                                                                                                                                                                                                                                                                                                                                                                                                                                              | Pnn                                                                                                                     | 4  | 6,9  | 2,420941111 |
| <b>P07356</b>                                                                                                                                                                                                             | Annexin A2                                                                                                                                                                                                                                                                                                                                                                                                                                                                                                                                         | Anxa2                                                                                                                   | 11 | 32,4 | 1,266777294 |
| <b>P18529;A0A075B5Q0;A0A075B5R3;A0A075B5Q4;A0A075B5Q2;A0A075B5R1;A0A075B5Q6;A0A075B5T2;A0A075B5P9;A0A075B5T3;A0A0A6YWU3;A0A075B5S5;A0A075B5R2;J3QNN6;P18525;P18524;P18530;P18526;P18527;P18528;P01801;P01802;P01799;P</b> | Ig heavy chain V region 5-76; Ig heavy chain V region 5-84; Ig heavy chain V region RF; Ig heavy chain V region 7-39; Ig heavy chain V region 345; Ig heavy chain V region 914; Ig heavy chain V region 6.96; Ig heavy chain V-III region J606; Ig heavy chain V-III region W3082; Ig heavy chain V-III region ABE-47N; Ig heavy chain V region AMPC1; Ig heavy chain V-III region E109; Ig heavy chain V-III region U61; Ig heavy chain V-III region T957; Ig heavy chain V-III region A4; Ig heavy chain V-III region HPC76; Ig heavy chain Mem5 | Ighv5-6; Ighv7-2; Ighv5-12; Ighv5-9; Ighv5-17; Ighv5-9-1; Ighv6-3; Ighv5-4; Ighv6-6; Ighv6-7; Ighv7-4; Ighv7-3; Ighv6-4 | 2  | 12   | 1,890615233 |

|                                                                       |                                                                                 |                  |    |      |             |
|-----------------------------------------------------------------------|---------------------------------------------------------------------------------|------------------|----|------|-------------|
| <b>01803;P01798;<br/>P01797;P01800<br/>;P01796;P0180<br/>4;P84751</b> |                                                                                 |                  |    |      |             |
| <b>P51807</b>                                                         | Dynein light chain Tctex-type 1                                                 | Dynlt1           | 2  | 24,8 | 1,649027529 |
| <b>P52875</b>                                                         | Transmembrane protein 165                                                       | Tmem165          | 1  | 5,9  | 1,1803963   |
| <b>P61514</b>                                                         | 60S ribosomal protein L37a                                                      | Rpl37a           | 3  | 41,3 | 1,244643723 |
| <b>P62301</b>                                                         | 40S ribosomal protein S13                                                       | Rps13            | 8  | 39,1 | 1,782793822 |
| <b>P62821</b>                                                         | Ras-related protein Rab-1A                                                      | Rab1A            | 2  | 40,5 | 1,196854452 |
| <b>P63276</b>                                                         | 40S ribosomal protein S17                                                       | Rps17            | 6  | 51,9 | 1,660438441 |
| <b>P70333</b>                                                         | Heterogeneous nuclear<br>ribonucleoprotein H2                                   | Hnrnp2           | 4  | 31,2 | 1,522513943 |
| <b>Q3TDN2</b>                                                         | FAS-associated factor 2                                                         | Faf2             | 4  | 13,9 | 1,230129221 |
| <b>Q61881</b>                                                         | DNA replication licensing factor<br>MCM7                                        | Mcm7             | 9  | 16,4 | 1,156083667 |
| <b>Q62095;Q6149<br/>6</b>                                             | ATP-dependent RNA helicase<br>DDX3Y                                             | Ddx3y            | 1  | 28,1 | 1,808867741 |
| <b>Q62167;P16381</b>                                                  | ATP-dependent RNA helicase<br>DDX3X;Putative ATP-dependent<br>RNA helicase Pl10 | Ddx3x;D1Pa<br>s1 | 5  | 37,5 | 1,030478515 |
| <b>Q62446</b>                                                         | Peptidyl-prolyl cis-trans isomerase<br>FKBP3                                    | Fkbp3            | 5  | 27,7 | 1,46042274  |
| <b>Q6ZWV7</b>                                                         | 60S ribosomal protein L35                                                       | Rpl35            | 6  | 30,1 | 1,338456276 |
| <b>Q78IK2</b>                                                         | Up-regulated during skeletal muscle<br>growth protein 5                         | Usmg5            | 2  | 27,6 | 1,4526065   |
| <b>Q78XF5</b>                                                         | Oligosaccharyltransferase complex<br>subunit OSTC                               | Ostc             | 1  | 8,1  | 1,291364159 |
| <b>Q7TN29</b>                                                         | Stromal membrane-associated<br>protein 2                                        | Smap2            | 1  | 1,9  | 1,293114934 |
| <b>Q8BY71</b>                                                         | Histone acetyltransferase type B<br>catalytic subunit                           | Hat1             | 2  | 7    | 1,061342768 |
| <b>Q8JZU2</b>                                                         | Tricarboxylate transport protein,<br>mitochondrial                              | Slc25a1          | 3  | 9,3  | 1,411726788 |
| <b>Q91V04</b>                                                         | Translocating chain-associated<br>membrane protein 1                            | Tram1            | 2  | 5,6  | 1,292887206 |
| <b>Q91V41</b>                                                         | Ras-related protein Rab-14                                                      | Rab14            | 8  | 45,1 | 1,072374102 |
| <b>Q920E5;A0A0<br/>G2JEA5</b>                                         | Farnesyl pyrophosphate synthase                                                 | Fdps             | 10 | 32,6 | 1,288873239 |
| <b>Q99JX4</b>                                                         | Eukaryotic translation initiation<br>factor 3 subunit M                         | Eif3m            | 4  | 17,4 | 1,699933888 |
| <b>Q99K85</b>                                                         | Phosphoserine aminotransferase                                                  | Psat1            | 18 | 59,2 | 1,405771987 |

|               |                                                                      |        |   |      |             |
|---------------|----------------------------------------------------------------------|--------|---|------|-------------|
| <b>Q9CQX2</b> | Cytochrome b5 type B                                                 | Cyb5b  | 3 | 40,4 | 1,174725104 |
| <b>Q9CR67</b> | Transmembrane protein 33                                             | Tmem33 | 4 | 15   | 1,42845741  |
| <b>Q9CRA4</b> | Methylsterol monooxygenase 1                                         | Msmo1  | 3 | 10,9 | 1,05664817  |
| <b>Q9CZB0</b> | Succinate dehydrogenase<br>cytochrome b560 subunit,<br>mitochondrial | Sdhc   | 2 | 12,4 | 1,855830867 |
| <b>Q9R0P4</b> | Small acidic protein                                                 | Smap   | 2 | 12,7 | 1,241030791 |
| <b>Q9R0Q9</b> | Mannose-P-dolichol utilization<br>defect 1 protein                   | Mpdu1  | 3 | 13,8 | 1,245829558 |
| <b>Q9WTS2</b> | Alpha-(1,6)-fucosyltransferase                                       | Fut8   | 1 | 1,6  | 2,103859235 |
